# Supplementary material for: Reprogramming immunosuppressive myeloid cells facilitates immunotherapy for colorectal cancer
Source: PubMed Central journal article supplement (PMC7799360; doi:10.15252/emmm.202012798), 2020-12-07
Supplement: EMMM-13-e12798-s001.pdf [file EMMM-13-e12798-s001.pdf]

## Reprogramming Immunosuppressive Myeloid Cells Facilitates Immunotherapy for Colorectal Cancer

Weiqiang Lu<sup>1,#,\*</sup>, Weiwei Yu<sup>1,#</sup>, Jiacheng He<sup>1</sup>, Wenjuan Liu<sup>1</sup>, Junjie Yang<sup>1</sup>, Xianhua Lin<sup>1</sup>, Yuanjin Zhang<sup>1</sup>, Xin Wang<sup>1</sup>, Wenhao Jiang<sup>1</sup>, Jian Luo<sup>1</sup>, Qiansen Zhang<sup>1</sup>, Huaiyu Yang<sup>1</sup>, Shihong Peng<sup>1</sup>, Zhengfang Yi<sup>1</sup>, Shancheng Ren<sup>2</sup>, Jin Chen<sup>3</sup>, Stefan Siwko<sup>4</sup>, Ruth Nussinov<sup>5,6</sup>, Feixiong Cheng<sup>7-9</sup>, Hankun Zhang<sup>1,\*</sup>, Mingyao Liu<sup>1,\*</sup>

## Appendix

Appendix Materials and Methods (Pages 2-5)

Appendix Figures S1-S3 (Page 6-8)

Appendix Tables S1-S9 (Page 9-29)

## Appendix Materials and Methods

### Chemistry: Preparation of TP-16

Reagents and solvents were obtained from commercial sources and used without further purification. All reactions were carried out with the use of standard techniques under an argon atmosphere and the progress of the reactions was monitored by TLC on SiO<sub>2</sub>. Proton and carbon NMR spectra were recorded at spectrometer frequencies of 500 MHz and obtained as CDCl<sub>3</sub> or DMSO-*d*<sub>6</sub> solutions (reported in ppm), using CDCl<sub>3</sub> (7.26 and 77.00 ppm) or DMSO-*d*<sub>6</sub> (2.50 and 39.51 ppm) as the reference standard. High-resolution mass spectra (HRMS) were gathered on a Bruker MicroTOF-Q II LCMS instrument operating in electrospray ionization (ESI). HPLC (Agilent Technologies 1200 Series) was employed for purity determination, using the following method: SunFire C18 column, 5 μm, 4.6x150 mm; column temperature 40 °C; with detection at 254 or 214 nm on a variable wavelength detector; flow rate = 1.0 mL/min; gradient of 0–100% acetonitrile in water (both containing 0.03 vol% of CF<sub>3</sub>COOH) in 16 min.

### Synthesis of TP-16<sup>a</sup>

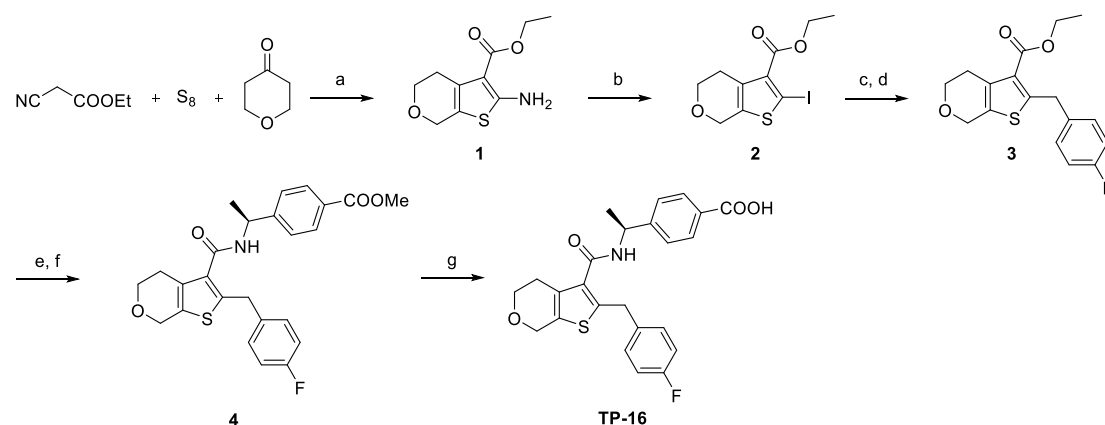

<sup>a</sup>Reagents and conditions: (a) morpholine, EtOH, 60 °C, 10 h, 90.5%; (b) 3M HCl (aq), NaNO<sub>2</sub>, KI, H<sub>2</sub>O, 0 °C, 34.9%; (c) *n*-BuLi (2.4 M in hexane), 4-fluorobenzaldehyde, Et<sub>2</sub>O, -78 °C to room temperature (rt), 50.7%; (d) Et<sub>3</sub>SiH, TFA, CH<sub>2</sub>Cl<sub>2</sub>, 0 °C, 95%; (e) LiOH·H<sub>2</sub>O, MeOH, THF, H<sub>2</sub>O, 70 °C, 100%; (f) methyl 4-[(1*S*)-1-aminoethyl]benzoate, 2-(7-azabenzotriazol-1-yl)-*N,N,N',N'*-tetramethyluronium hexafluorophosphate (HATU), DIPEA, DMF, rt, 82%; (g) LiOH·H<sub>2</sub>O, MeOH, THF, H<sub>2</sub>O, 70 °C, 96%.

### NMR Spectra

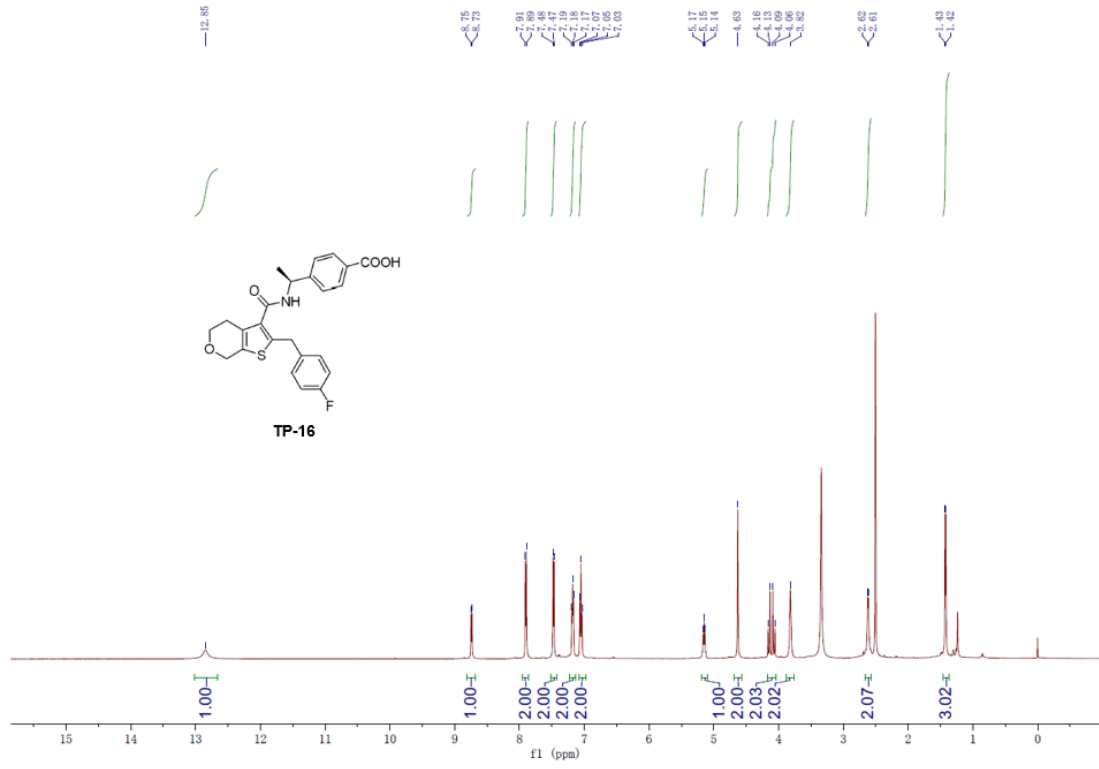

## Methods

### Molecular Docking

Molecular docking studies were performed using Autodock4.2.6 (Morris et al., 2009). Ligand TP-16 was docked into the EP4 receptor bound to an antagonist, ONO-AE3-208 (PDB: 5YWY) (Toyoda et al., 2019). A grid of 60, 60, and 60 points in x, y, and z directions was created with a grid spacing of 0.375 Å at the binding site for docking. The program AutoDockTool-1.5.6 was used for preparing EP4 receptor and ligand TP-16 parameter files. A Lamarckian genetic algorithm was used for generating binding poses (Morris et al., 1998). We computed 200 docking runs for TP-16, with the rotation of all non-ring torsion angles. The lowest binding energy conformation was selected for further analysis.

### Preliminary pharmacokinetic studies of TP-16 *in vivo*

TP-16 was administered intravenously or orally by gavage as a 1 or 10 mg/kg solution, respectively (dose volume, 5 or 10 mL/kg respectively; dose vehicle, 5% (v/v) dimethyl sulfoxide (DMSO), 10% solutol, and 85% β-cyclodextrin) to male CD1 mice (n = 3). Blood samples were collected at 0.08, 0.25, 0.5, 1, 2, 4, 8, and 24 hr after administration. After suitable sample preparation, the concentration of TP-16 in plasma samples was determined by the Agilent 1290 HPLC system, coupled with a 6460 triple-quadrupole mass spectrometer and an Agilent Jet Stream electrospray ionization (ESI) source (Agilent Technologies, USA). Pharmacokinetic parameters were calculated by WinNonlin software version 7.0 based on non-compartmental analysis (Pharsight Corporation, Mountain View, USA). Mean plasma concentration-time curves were plotted by GraphPad Prism 6.0 (GraphPad software Inc., CA, USA).

### Toxicity Evolution of TP-16

The *in vivo* toxicity test of TP-16 was performed by Shanghai Medicilon Inc. Briefly, Sprague-Dawley (SD) rats were randomly divided into two groups, vehicle group and TP-16 (100 mg/kg) group, and each group have six animals (three males and three females). TP-16 was dissolved in 0.5% MC400 and orally administrated once daily for 14 days. Abnormal behaviors and mortality were observed every day and body weight was recorded every three days. Animals were sacrificed on day 15, and blood parameters and organ morphology were recorded.

## Reference

Morris GM, Goodsell DS, Halliday RS, Huey R, Hart WE, Belew RK, *et al.* Automated docking using a Lamarckian genetic algorithm and an empirical binding free energy function. *J. Comput. Chem.*, 1998, 19: 1639-1662.

Morris GM, Huey R, Lindstrom W, Sanner MF, Belew RK, Goodsell DS, *et al.*. AutoDock4 and AutoDockTools4: Automated docking with selective receptor flexibility. *J. Comput. Chem.*, 2009, 30: 2785-2791.

Toyoda Y, Morimoto K, Suno R, Horita S, Yamashita K, Hirata K, *et al.* (2019). Ligand binding to human prostaglandin E receptor EP4 at the lipid-bilayer interface. *Nat. Chem. Biol.*, 2019, 15: 18-26.

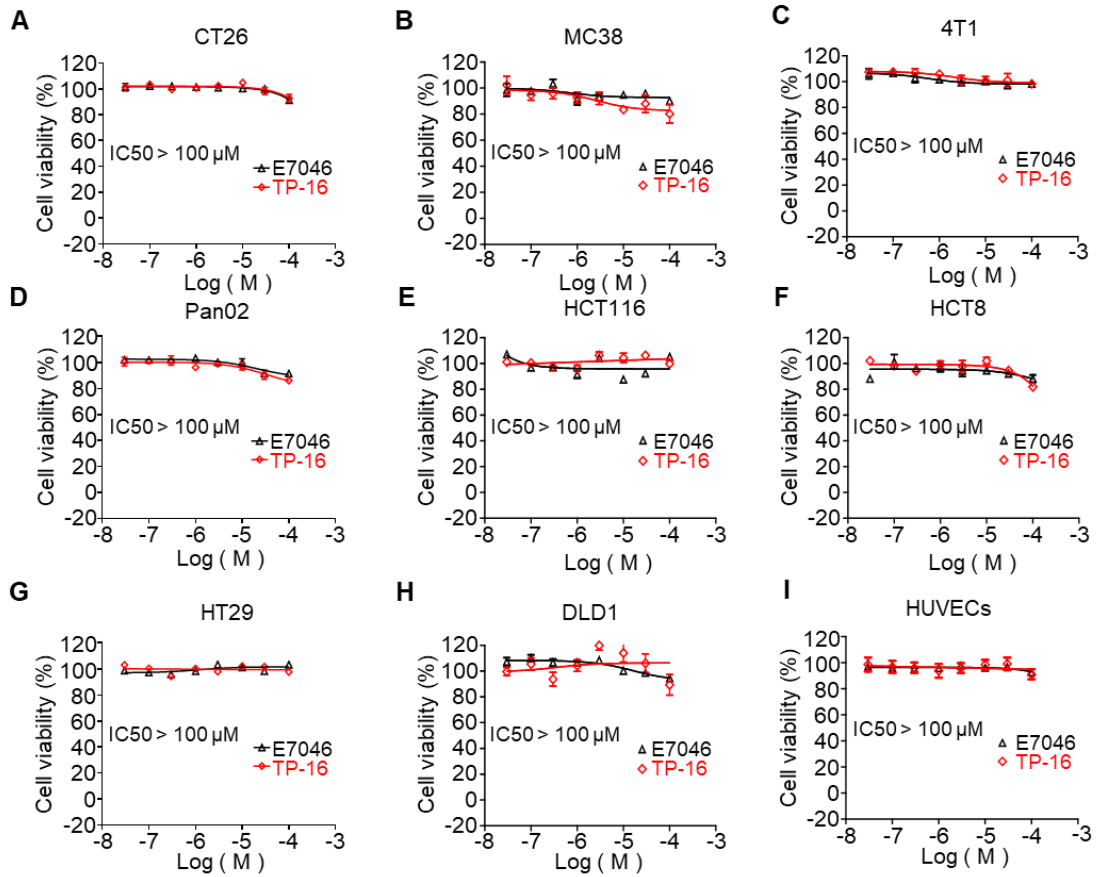

Appendix Figure S1. The *in vitro* cytotoxicity of TP-16. The cytotoxicity curves of E7046 and TP-16 against various cancer cells. Mouse cancer cells: CT26 (A), MC38 (B), 4T1 (C), Pan02 (D). Human colon cancer cells: HCT116 (E), HCT8 (F), HT29 (G) and DLD1 (H). Human normal cell line: HUVECs (I). Cell viability was measured by MTS. Data are presented as mean  $\pm$  SEM derived from three independent experiments (n=3).

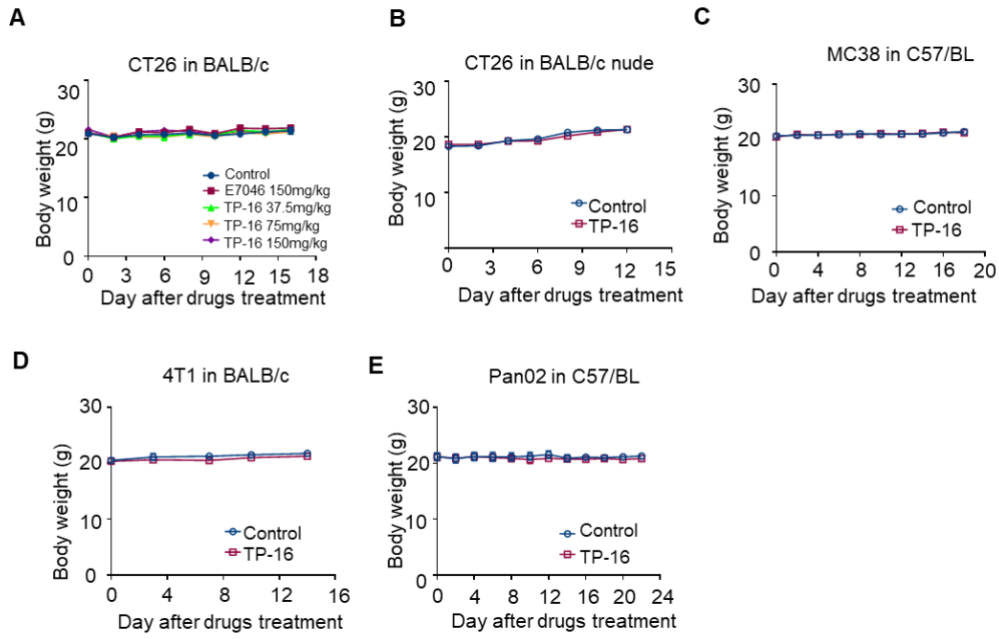

Appendix Figure S2. Mouse body weight of CT26 tumor-bearing BALB/c (A), CT26 tumor-bearing BALB/c nude mice (B), MC38 tumor-bearing C57/BL(C), 4T1 tumor-bearing BALB/c (D), and Pan02 tumor-bearing BALB/c (E) during indicated drug treatments.

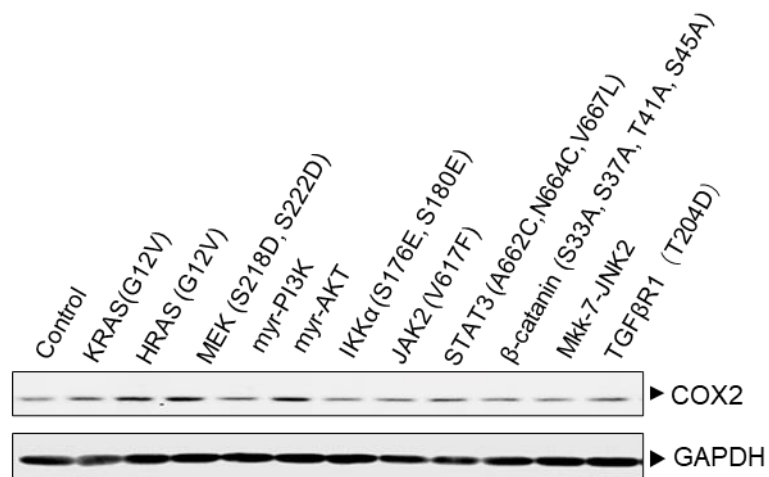

Appendix Figure S3. Multiple oncogenic events induce COX2 expression. CHO cells were transfected with indicated expression vector of mutated oncogenes for 24 hr, and then cells were harvested and lysed for the detection of COX2 expression by Western blot. GAPDH served as a loading control.



Appendix Table S1. Selectivity of TP-16 on GPCRs in LANCE Ultra cAMP assay.

| Receptor            | LANCE Ultra cAMP assay                  |         |                                            |         |                                   |
|---------------------|-----------------------------------------|---------|--------------------------------------------|---------|-----------------------------------|
|                     | Known agonists<br>EC <sub>50</sub> (μM) |         | Known antagonists<br>IC <sub>50</sub> (μM) |         | TP-16<br>IC <sub>50</sub><br>(μM) |
| AODRA <sub>1</sub>  | NECA                                    | 0.0024  | DPCPX                                      | 0.0032  | >10 <sup>a</sup>                  |
| ADORA <sub>2A</sub> | NECA                                    | 0.00046 | ZM-241385                                  | 0.0016  | >10                               |
| ADORA <sub>2B</sub> | NECA                                    | 0.0041  | MRS 1754<br>hydrate                        | 0.99    | >10                               |
| ADORA <sub>3</sub>  | NECA                                    | 0.0040  | MRS 1220                                   | 0.00074 | >10                               |
| CB <sub>1</sub>     | CP55940                                 | 0.00053 | AM251                                      | 0.0016  | >10                               |
| CB <sub>2</sub>     | CP55940                                 | 0.00094 | AM630                                      | 0.26    | >10                               |
| DRD <sub>2</sub>    | Dopamine                                | 0.0019  | Spiperone                                  | 0.00027 | >10                               |
| HTR <sub>1B</sub>   | RU24969                                 | 0.018   | GR 55562<br>dihydrochloride                | 0.035   | >10                               |

<sup>a</sup>cAMP based GPCR selectivity assay was performed by Pharmaron (Beijing, China)

Appendix Table S2. Selectivity of TP-16 on GPCRs in calcium flux assay.

| Receptor | Calcium flux assay                      |        |                                            |                                   |                  |
|----------|-----------------------------------------|--------|--------------------------------------------|-----------------------------------|------------------|
|          | Known agonists<br>EC <sub>50</sub> (μM) |        | Known antagonists<br>IC <sub>50</sub> (μM) | TP-16<br>IC <sub>50</sub><br>(μM) |                  |
| ADRA1B   | (R)-(-)-Phenylephrine hydrochloride     | 0.0014 | Prazosin hydrochloride                     | 0.0149                            | >10 <sup>a</sup> |
| ADRA1D   | Norepinephrine bitartrate monohydrate   | 0.0012 | Prazosin hydrochloride                     | 0.0046                            | >10              |
| ADRA2A   | UK 14,304 tartrate                      | 0.0057 | Rauwolscine hydrochloride                  | 0.0169                            | >10              |
| ADRB1    | Isoprenaline hydrochloride              | 0.0055 | CGP 20712 dihydrochloride                  | 0.0185                            | >10              |
| ADRB2    | Isoprenaline hydrochloride              | 0.0111 | ICI 118,551 hydrochloride                  | 0.0021                            | >10              |
| AT1      | Angiotensin II 5-valine                 | 0.0002 | Irbesartan                                 | 0.0109                            | >10              |
| AVPR1A   | Oxytocin acetate                        | 0.0087 | Conivaptan hydrochloride                   | 0.1325                            | >10              |
| BB1      | Neuromedin B                            | 0.0002 | PD 176252                                  | 0.8628                            | >10              |
| CHRM1    | Acetylcholine chloride                  | 0.0014 | Atropine sulfate monohydrate               | 0.0014                            | >10              |
| CHRM2    | Acetylcholine chloride                  | 0.0040 | Atropine sulfate monohydrate               | 0.0041                            | >10              |
| CHRM3    | Acetylcholine chloride                  | 0.0003 | Atropine sulfate monohydrate               | 0.0013                            | >10              |
| DRD1     | Dopamine hydrochloride                  | 0.3038 | SCH 23390 hydrochloride                    | 0.0009                            | >10              |
| HRH1     | Histamine                               | 0.0122 | Mepyramine maleate                         | 0.0059                            | >10              |
| HTR2B    | RU24969                                 | 0.0118 | Ritanserlin                                | 0.0308                            | >10              |
| OPRD1    | ADL-5859                                | 0.2663 | Naltrindole hydrochloride                  | 0.0012                            | >10              |
| OPRK1    | Nalfurafine hydrochloride               | 0.0029 | Norbinaltorphimine dihydrochloride         | 0.0010                            | >10              |
| OPRM1    | Loperamide hydrochloride                | 0.0664 | Alvimopan dihydrate                        | 0.0023                            | >10              |

<sup>a</sup>Calcium flux based GPCR selectivity assay was performed by Pharmaron (Beijing, China).

Appendix Table S3. Pharmacokinetic parameters of TP-16 after oral administration or intravenous injection in CD1 mice.

| Pharmacokinetic parameters     | P.O. (10 mg/kg) | I.V. (1 mg/kg) |
|--------------------------------|-----------------|----------------|
| C <sub>max</sub> (ng/mL)       | 3851.8          | —              |
| C <sub>0</sub> (ng/mL)         | \               | 2370.2         |
| t <sub>1/2</sub> (hr)          | 5.4             | 3.0            |
| AUC <sub>0-24</sub> (hr*ng/mL) | 8399.8          | 2137.6         |
| AUC <sub>0-∞</sub> (hr*ng/mL)  | 8576.7          | 2140.6         |
| V <sub>d</sub> /F (mL/kg)      | 9083.1          | 2016.0         |
| CL/F (mL/min/kg)               | 1166.0          | 467.2          |
| MRT (hr)                       | 3.7             | 2.1            |
| Bioavailability (%)            | 40.1            | —              |

Appendix Table S4. In vitro metabolic stability assessment using liver microsome.

| Species | Remaining Percentages at 120 min (%) | In vitro T1/2 (min) | In vitro Clint ( $\mu\text{L}/\text{min}/10^6$ cells) | Scale-up Clint ( $\text{mL}/\text{min}/\text{kg}$ ) | Predicted hepatic Clint ( $\text{mL}/\text{min}/\text{kg}$ ) | Hepatic Extraction Ratio (ER) |
|---------|--------------------------------------|---------------------|-------------------------------------------------------|-----------------------------------------------------|--------------------------------------------------------------|-------------------------------|
| Human   | 90.5 <sup>a</sup>                    | >581                | <2.39                                                 | <6.07                                               | <4.69                                                        | <0.227                        |
| Mouse   | 70.6                                 | 235                 | 5.91                                                  | 69.8                                                | 39.3                                                         | 0.437                         |

<sup>a</sup>Liver microsomal stability test was tested by WuXi AppTec (Shanghai, China)

Appendix Table S5. Summary of hematological data.

|                                    | Vehicle      | TP-16<br>(100 mg/kg/day) |
|------------------------------------|--------------|--------------------------|
| Male                               |              |                          |
| WBC (10 <sup>9</sup> /L)           | 10.21 ± 1.26 | 11.81 ± 3.1              |
| RBC (10 <sup>12</sup> /L)          | 7.17 ± 0.01  | 6.92 ± 0.46              |
| HGB (g/L)                          | 141 ± 0      | 137 ± 8                  |
| HCT (%)                            | 43.9 ± 0.8   | 43.1 ± 1.8               |
| MCV (fL)                           | 61.3 ± 1.1   | 62.5 ± 1.6               |
| MCH (pg)                           | 19.7 ± 0     | 19.8 ± 0.3               |
| MCHC (g/L)                         | 322 ± 6      | 317 ± 5                  |
| PLT (10 <sup>9</sup> /L)           | 1152 ± 26    | 868 ± 280                |
| Neutrophils (10 <sup>9</sup> /L)   | 0.88 ± 0.1   | 1.67 ± 0.49              |
| Neutrophils (%)                    | 8.6 ± 0.1    | 15.6 ± 8.6               |
| Lymphocytes (10 <sup>9</sup> /L)   | 8.75 ± 1.22  | 9.48 ± 3.26              |
| Lymphocytes (%)                    | 85.6 ± 1.5   | 79.1 ± 7.3               |
| Monocytes (10 <sup>9</sup> /L)     | 0.51 ± 0.04  | 0.57 ± 0.27              |
| Monocytes (%)                      | 5.1 ± 1.1    | 4.7 ± 1.7                |
| Eosinophils (10 <sup>9</sup> /L)   | 0.06 ± 0.02  | 0.06 ± 0.02              |
| Eosinophils (%)                    | 0.6 ± 0.3    | 0.5 ± 0.2                |
| Basophils (10 <sup>9</sup> /L)     | 0.02 ± 0     | 0.02 ± 0.01              |
| Basophils (%)                      | 0.2 ± 0      | 0.2 ± 0.1                |
| Reticulocytes (%)                  | 8.53 ± 0.83  | 9.14 ± 1.16              |
| Reticulocytes (10 <sup>9</sup> /L) | 611.2 ± 60.4 | 629.4 ± 50.9             |
| Female                             |              |                          |
| WBC (10 <sup>9</sup> /L)           | 9.55 ± 1.81  | 10.81 ± 0.81             |
| RBC (10 <sup>12</sup> /L)          | 7.7 ± 0.36   | 8.08 ± 0.37              |
| HGB (g/L)                          | 147 ± 7      | 146 ± 5                  |
| HCT (%)                            | 44.7 ± 1.9   | 45.1 ± 1                 |
| MCV (fL)                           | 58.1 ± 1.4   | 55.8 ± 1.5               |
| MCH (pg)                           | 19.1 ± 0.3   | 18.1 ± 0.3               |
| MCHC (g/L)                         | 328 ± 4      | 325 ± 4                  |
| PLT (10 <sup>9</sup> /L)           | 1124 ± 82    | 1152 ± 95                |
| Neutrophils (10 <sup>9</sup> /L)   | 0.75 ± 0.09  | 1.21 ± 0.08              |
| Neutrophils (%)                    | 8 ± 0.7      | 11.3 ± 1.4               |
| Lymphocytes (10 <sup>9</sup> /L)   | 8.24 ± 1.62  | 8.98 ± 0.68              |
| Lymphocytes (%)                    | 86.1 ± 1.1   | 83.1 ± 1.2               |
| Monocytes (10 <sup>9</sup> /L)     | 0.45 ± 0.14  | 0.5 ± 0.17               |
| Monocytes (%)                      | 4.6 ± 1      | 4.6 ± 1.3                |
| Eosinophils (10 <sup>9</sup> /L)   | 0.1 ± 0.02   | 0.1 ± 0.02               |

|                                    |               |              |
|------------------------------------|---------------|--------------|
| Eosinophils (%)                    | 1.1 ± 0.4     | 0.9 ± 0.2    |
| Basophils (10 <sup>9</sup> /L)     | 0.02 ± 0.01   | 0.01 ± 0.01  |
| Basophils (%)                      | 0.2 ± 0.1     | 0.13 ± 0.06  |
| Reticulocytes (%)                  | 5.68 ± 1.58   | 5.56 ± 0.68  |
| Reticulocytes (10 <sup>9</sup> /L) | 434.9 ± 109.9 | 448.2 ± 38.6 |

---

Data expressed as means ± SD. \*Significantly different from control group (p < 0.05).

Appendix Table S6. Summary of organ data.

| Organ                    |        | Male    |       | Female  |       |
|--------------------------|--------|---------|-------|---------|-------|
|                          |        | Vehicle | TP-16 | Vehicle | TP-16 |
| Liver                    | Normal | 3/3     | 3/3   | 3/3     | 3/3   |
| Kidney                   | Normal | 3/3     | 3/3   | 3/3     | 3/3   |
| Thyroid gland            | Normal | 3/3     | 3/3   | 3/3     | 3/3   |
| Urinary bladder          | Normal | 3/3     | 3/3   | 3/3     | 3/3   |
| Spleen                   | Normal | 3/3     | 3/3   | 3/3     | 3/3   |
| Pancreas                 | Normal | 3/3     | 3/3   | 3/3     | 3/3   |
| Thymus                   | Normal | 3/3     | 3/3   | 3/3     | 3/3   |
| Thyroid gland            | Normal | 3/3     | 3/3   | 3/3     | 3/3   |
| Parathyroid gland        | Normal | 3/3     | 3/3   | 3/3     | 3/3   |
| Trachea                  | Normal | 3/3     | 3/3   | 3/3     | 3/3   |
| Esophagus                | Normal | 3/3     | 3/3   | 3/3     | 3/3   |
| Lung                     | Normal | 3/3     | 3/3   | 3/3     | 3/3   |
| Heart                    | Normal | 3/3     | 3/3   | 3/3     | 3/3   |
| Salivary gland           | Normal | 3/3     | 3/3   | 3/3     | 3/3   |
| Cervical lymph node      | Normal | 3/3     | 3/3   | 3/3     | 3/3   |
| Mesenteric lymph node    | Normal | 3/3     | 3/3   | 3/3     | 3/3   |
| Stomach                  | Normal | 3/3     | 3/3   | 3/3     | 3/3   |
| Duodenum                 | Normal | 3/3     | 3/3   | 3/3     | 3/3   |
| Jejunum                  | Normal | 3/3     | 3/3   | 3/3     | 3/3   |
| Ileum                    | Normal | 3/3     | 3/3   | 3/3     | 3/3   |
| Colon                    | Normal | 3/3     | 3/3   | 3/3     | 3/3   |
| Rectum                   | Normal | 3/3     | 3/3   | 3/3     | 3/3   |
| Preputial/Clitoral gland | Normal | 3/3     | 3/3   | 3/3     | 3/3   |
| Skin/ Mammary gland      | Normal | 3/3     | 3/3   | 3/3     | 3/3   |
| Eye                      | Normal | 3/3     | 3/3   | 3/3     | 3/3   |
| Harderian gland          | Normal | 3/3     | 3/3   | 3/3     | 3/3   |
| Brain                    | Normal | 3/3     | 3/3   | 3/3     | 3/3   |
| Pituitary gland          | Normal | 3/3     | 3/3   | 3/3     | 3/3   |
| Femur/Bone marrow        | Normal | 3/3     | 3/3   | 3/3     | 3/3   |
| Nasal cavity             | Normal | 3/3     | 3/3   | 3/3     | 3/3   |
| Testis                   | Normal | 3/3     | 3/3   | 3/3     | 3/3   |
| Epididymis               | Normal | 3/3     | 3/3   | -       | -     |

|                 |        |     |     |     |     |
|-----------------|--------|-----|-----|-----|-----|
| Prostate        | Normal | 3/3 | 3/3 | -   | -   |
| Seminal vesicle | Normal | 3/3 | 3/3 | -   | -   |
| Ovary           | Normal | -   | -   | 3/3 | 3/3 |
| Uterus          | Normal | -   | -   | 3/3 | 3/3 |
| Vagina          | Normal | -   | -   | 3/3 | 3/3 |

---



Appendix Table S7. Primers for q-PCR

| Gene                            | Origin | Forward                  | Reverse                  |
|---------------------------------|--------|--------------------------|--------------------------|
| <i>Ptger1</i>                   | Mouse  | GGGATGCTCGAAACACCAGA     | TTGGGGTTTTAAGGCCGTGT     |
| <i>Ptger2</i>                   | Mouse  | GGTCCTGAGGTTAATGCGCT     | TGGCACTGGACTGGGTAGAA     |
| <i>Ptger3</i>                   | Mouse  | TGTCGGTTGAGCAATGCAAGACAC | TCTGGCAGAACTTCCGAAGAAGGA |
| <i>Ptger4</i>                   | Mouse  | TTTCTTCGGTCTGTCCGGTC     | GGCTGTAGAAGTAGGCGTGG     |
| <i>Cxcl10</i>                   | Mouse  | ATGACGGGCCAGTGAGAATG     | GAGGCTCTCTGCTGTCCATC     |
| <i>Tnfa</i>                     | Mouse  | AGGCACTCCCCCAAAGATG      | CCACTTGGTGGTTTGTGAGTG    |
| <i>Ccl2</i>                     | Mouse  | TTAAAAACCTGGATCGGAACCAA  | GCATTAGCTTCAGATTTACGGGT  |
| <i>Ccl5</i>                     | Mouse  | TGCTTTGCCTACCTCTCCCT     | ACACACTTGGCGGTTCCCTC     |
| <i>Arg-1</i>                    | Mouse  | ACATTGGCTTGCGAGACGTA     | ATCACCTTGCCAATCCCCAG     |
| <i>Ptgs2</i>                    | Mouse  | CATCCCCTTCCTGCGAAGTT     | CATGGGAGTTGGGCAGTCAT     |
| <i>Il-4ra</i>                   | Mouse  | ACACCAATGTGTCCGACGAA     | CTGCAGGGTTGTCTCTCTG      |
| <i>Ido1</i>                     | Mouse  | CCCAGTCCGTGAGTTTGTCA     | TCTTCCGACTTGTCGCCATC     |
| <i>Il-10</i>                    | Mouse  | AAGGGTACTTGGGTTGCCA      | GCCTGGGGCATCACTTCTAC     |
| <i>CD206</i>                    | Mouse  | CATGAGGCTTCTCCTGCTTCTG   | TTGCCGTCTGAACTGAGATGG    |
| <i>Fizzl</i>                    | Mouse  | CCAATCCAGCTAACTATCCCTCC  | CCAGTCAACGAGTAAGCACAG    |
| <i>Ym1</i>                      | Mouse  | AGAAGGGAGTTTCAAACCTGGT   | CTCTTGCTGATGTGTGTAAGTGA  |
| <i>Il-6</i>                     | Mouse  | GGGACTGATGCTGGTGACAA     | ACAGGTCTGTTGGGAGTGGT     |
| <i>Il-1<math>\beta</math></i>   | Mouse  | TGCCACCTTTTGACAGTGATG    | AAGGTCCACGGGAAAGACAC     |
| <i>Cxcl1</i>                    | Mouse  | CCATCCAGAGCTTGACGGTG     | TGGGGGTTGAGGCAAACCTTC    |
| <i><math>\beta</math>-Actin</i> | Mouse  | GTACGCCAACACAGTGCTG      | CGTCATACTCCTGCTTGCTG     |

Appendix Table S8. P values and statistical tests in figures.

| <b>Figure 1</b> | <b>P value</b> | <b>Comparison</b>                                                                                                                     | <b>Statistical test</b> |
|-----------------|----------------|---------------------------------------------------------------------------------------------------------------------------------------|-------------------------|
| 1A              | 0.079          | EP2: bone marrow myeloid cells vs colon tumor myeloid cells                                                                           | Kolmogorov–Smirnov test |
|                 | 0.015          | EP4: bone marrow myeloid cells vs colon tumor myeloid cells                                                                           | Kolmogorov–Smirnov test |
| 1E              | 0.0087         | (% F4/80 <sup>+</sup> CD11c <sup>-</sup> Macrophage of BMMC) GM-CSF/IL-4 vs GM-CSF/IL-4 + PGE <sub>2</sub>                            | Unpaired t test         |
|                 | 0.025          | (% F4/80 <sup>+</sup> CD11c <sup>-</sup> Macrophage of BMMC) GM-CSF/IL-4 + PGE <sub>2</sub> vs GM-CSF/IL-4 + PGE <sub>2</sub> + E7046 | Unpaired t test         |
|                 | 0.017          | (% F4/80 <sup>-</sup> CD11c <sup>+</sup> DC of BMMC) GM-CSF/IL-4 vs GM-CSF/IL-4 + PGE <sub>2</sub>                                    | Unpaired t test         |
|                 | 0.0035         | (% F4/80 <sup>-</sup> CD11c <sup>+</sup> DC of BMMC) GM-CSF/IL-4 vs GM-CSF/IL-4 + PGE <sub>2</sub> + E7046                            | Unpaired t test         |
| 1H              | 0.00090        | (% mMDSC of BMMC) GM-CSF/IL-6 vs GM-CSF/IL-6 + PGE <sub>2</sub>                                                                       | Unpaired t test         |
|                 | 0.0011         | (% mMDSC of BMMC) GM-CSF/IL-6 + PGE <sub>2</sub> vs GM-CSF/IL-6 + PGE <sub>2</sub> + PF-04418948                                      | Unpaired t test         |
|                 | 0.0034         | (% mMDSC of BMMC) GM-CSF/IL-6 + PGE <sub>2</sub> vs GM-CSF/IL-6 + PGE <sub>2</sub> + E7046                                            | Unpaired t test         |
|                 | 0.00010        | (% PMN-MDSC of BMMC) GM-CSF/IL-6 vs GM-CSF/IL-6 + PGE <sub>2</sub>                                                                    | Unpaired t test         |
|                 | 0.0012         | (% PMN-MDSC of BMMC) GM-CSF/IL-6 + PGE <sub>2</sub> vs GM-CSF/IL-6 + PGE <sub>2</sub> +E7046                                          | Unpaired t test         |
| <b>Figure 3</b> | <b>P value</b> | <b>Comparison</b>                                                                                                                     | <b>Statistical test</b> |
| 3B              | 0.0231         | Control vs TP-16 75mg/kg                                                                                                              | One-way ANOVA           |

|                 |                |                                                                                                  |                         |
|-----------------|----------------|--------------------------------------------------------------------------------------------------|-------------------------|
|                 | 0.0221         | Control vs TP-16 150mg/kg                                                                        | One-way ANOVA           |
| 3C              | 0.33           | Control vs TP-16                                                                                 | Unpaired t test         |
| 3D              | 0.0045         | Control vs TP-16                                                                                 | Unpaired t test         |
| 3E              | 0.0055         | Control vs TP-16                                                                                 | Unpaired t test         |
| 3F              | 0.0012         | Control vs TP-16                                                                                 | Unpaired t test         |
| 3G              | 0.038          | Control vs TP-16                                                                                 | Unpaired t test         |
| <b>Figure 4</b> | <b>P value</b> | <b>Comparison</b>                                                                                | <b>Statistical test</b> |
| 4A              | 0.0024         | Control vs TP-16                                                                                 | Unpaired t test         |
| 4B              | 0.0027         | Control vs TP-16                                                                                 | Unpaired t test         |
| 4C              | 0.0012         | Control vs TP-16                                                                                 | Unpaired t test         |
| 4D              | 0.29           | Control vs TP-16 ( <i>Cxcl10</i> )                                                               | Unpaired t test         |
|                 | < 0.0001       | Control vs TP-16 ( <i>Tnfa</i> )                                                                 | Unpaired t test         |
|                 | 0.0055         | Control vs TP-16 ( <i>Ccl2</i> )                                                                 | Unpaired t test         |
|                 | 0.0086         | Control vs TP-16 ( <i>Ccl5</i> )                                                                 | Unpaired t test         |
| 4E              | 0.044          | Control vs TP-16 ( <i>Arg-1</i> )                                                                | Unpaired t test         |
|                 | 0.0017         | Control vs TP-16 ( <i>CD206</i> )                                                                | Unpaired t test         |
|                 | 0.0089         | Control vs TP-16 ( <i>Fizzl</i> )                                                                | Unpaired t test         |
|                 | 0.00010        | Control vs TP-16 ( <i>Ym1</i> )                                                                  | Unpaired t test         |
| 4F              | 0.033          | Control vs TP-16 ( <i>Arg-1</i> )                                                                | Unpaired t test         |
|                 | 0.0004         | Control vs TP-16 ( <i>Ptgs2</i> )                                                                | Unpaired t test         |
|                 | 0.0023         | Control vs TP-16 ( <i>Il-4ra</i> )                                                               | Unpaired t test         |
|                 | 0.044          | Control vs TP-16 ( <i>Ido1</i> )                                                                 | Unpaired t test         |
|                 | < 0.0001       | Control vs TP-16 ( <i>Il-10</i> )                                                                | Unpaired t test         |
| 4G              | 0.0018         | Control vs TP-16 ( <i>Arg-1</i> )                                                                | Unpaired t test         |
|                 | 0.0029         | Control vs TP-16 ( <i>Ptgs2</i> )                                                                | Unpaired t test         |
|                 | 0.026          | Control vs TP-16 ( <i>Il-4ra</i> )                                                               | Unpaired t test         |
|                 | 0.0025         | Control vs TP-16 ( <i>Ido1</i> )                                                                 | Unpaired t test         |
|                 | 0.014          | Control vs TP-16 ( <i>Il-10</i> )                                                                | Unpaired t test         |
| 4H              | < 0.0001       | Control vs TP-16                                                                                 | Unpaired t test         |
| 4I              | 0.0012         | Control vs TP-16                                                                                 | Unpaired t test         |
| 4J              | 0.0005         | Control vs TP-16                                                                                 | Unpaired t test         |
| 4K              | 0.0015         | Control vs TP-16                                                                                 | Unpaired t test         |
| <b>Figure 5</b> | <b>P value</b> | <b>Comparison</b>                                                                                | <b>Statistical test</b> |
| 5A              | < 0.0001       | Control vs IFN $\gamma$ ( <i>Cxcl10</i> )                                                        | One-way ANOVA           |
|                 | 0.0044         | Control + IFN $\gamma$ vs Control + IFN $\gamma$ + PGE $_2$ ( <i>Cxcl10</i> )                    | One-way ANOVA           |
|                 | < 0.0001       | Control + IFN $\gamma$ + PGE $_2$ vs Control + IFN $\gamma$ + PGE $_2$ + TP-16 ( <i>Cxcl10</i> ) | One-way ANOVA           |
|                 | 0.004          | Control vs IFN $\gamma$ ( <i>Tnfa</i> )                                                          | One-way ANOVA           |
|                 | 0.44           | Control + IFN $\gamma$ vs Control + IFN $\gamma$ + PGE $_2$ ( <i>Tnfa</i> )                      | One-way ANOVA           |
|                 | < 0.0001       | Control + IFN $\gamma$ + PGE $_2$ vs                                                             | One-way ANOVA           |

|    |          |                                                                                                 |               |
|----|----------|-------------------------------------------------------------------------------------------------|---------------|
|    |          | Control + IFN $\gamma$ + PGE $_2$ + TP-16 ( <i>Tnfa</i> )                                       |               |
|    | 0.058    | Control vs IFN $\gamma$ ( <i>Arg-1</i> )                                                        | One-way ANOVA |
|    | < 0.0001 | Control + IFN $\gamma$ vs Control + IFN $\gamma$ + PGE $_2$ ( <i>Arg-1</i> )                    | One-way ANOVA |
|    | < 0.0001 | Control + IFN $\gamma$ + PGE $_2$ vs Control + IFN $\gamma$ + PGE $_2$ + TP-16 ( <i>Arg-1</i> ) | One-way ANOVA |
|    | < 0.0001 | Control vs IFN $\gamma$ ( <i>Ym-1</i> )                                                         | One-way ANOVA |
|    | 0.001    | Control + IFN $\gamma$ vs Control + IFN $\gamma$ + PGE $_2$ ( <i>Ym-1</i> )                     | One-way ANOVA |
|    | 0.0004   | Control + IFN $\gamma$ + PGE $_2$ vs Control + IFN $\gamma$ + PGE $_2$ + TP-16 ( <i>Ym-1</i> )  | One-way ANOVA |
| 5B | < 0.0001 | Control vs IL-4 ( <i>Arg-1</i> )                                                                | One-way ANOVA |
|    | < 0.0001 | Control + IL-4 vs Control + IL-4 + PGE $_2$ ( <i>Arg-1</i> )                                    | One-way ANOVA |
|    | < 0.0001 | Control + IL-4 + PGE $_2$ vs Control + IL-4 + PGE $_2$ + TP-16 ( <i>Arg-1</i> )                 | One-way ANOVA |
|    | <0.0001  | Control vs IL-4 ( <i>Ym-1</i> )                                                                 | One-way ANOVA |
|    | 0.034    | Control + IL-4 vs Control + IL-4 + PGE $_2$ ( <i>Ym-1</i> )                                     | One-way ANOVA |
|    | 0.0003   | Control + IL-4 + PGE $_2$ vs Control + IL-4 + PGE $_2$ + TP-16 ( <i>Ym-1</i> )                  | One-way ANOVA |
|    | <0.0001  | Control vs IL-4 ( <i>CD206</i> )                                                                | One-way ANOVA |
|    | 0.011    | Control + IL-4 vs Control + IL-4 + PGE $_2$ ( <i>CD206</i> )                                    | One-way ANOVA |
|    | 0.013    | Control + IL-4 + PGE $_2$ vs Control + IL-4 + PGE $_2$ + TP-16 ( <i>CD206</i> )                 | One-way ANOVA |
| 5C | 0.007    | (% mMDSC of BMMC) GM-CSF/IL-6 vs GM-CSF/IL-6 + PGE $_2$                                         | One-way ANOVA |
|    | 0.048    | (% mMDSC of BMMC) GM-CSF/IL-6 + PGE $_2$ vs GM-CSF/IL-6 + PGE $_2$ + 0.1 $\mu$ M TP16           | One-way ANOVA |
|    | 0.012    | (% mMDSC of BMMC) GM-CSF/IL-6 + PGE $_2$ vs GM-CSF/IL-6 + PGE $_2$ + 1 $\mu$ M TP16             | One-way ANOVA |

|    |         |                                                                                                              |               |
|----|---------|--------------------------------------------------------------------------------------------------------------|---------------|
|    | 0.008   | (% mMDSC of BMMC)<br>GM-CSF/IL-6 + PGE <sub>2</sub> vs<br>GM-CSF/IL-6 + PGE <sub>2</sub> + 10<br>μM TP16     | One-way ANOVA |
|    | <0.0001 | (% PMN-MDSC of BMMC)<br>GM-CSF/IL-6 vs<br>GM-CSF/IL-6 + PGE <sub>2</sub>                                     | One-way ANOVA |
|    | 0.0014  | (% PMN-MDSC of BMMC)<br>GM-CSF/IL-6 + PGE <sub>2</sub> vs<br>GM-CSF/IL-6 + PGE <sub>2</sub> + 0.1<br>μM TP16 | One-way ANOVA |
|    | 0.0006  | (% PMN-MDSC of BMMC)<br>GM-CSF/IL-6 + PGE <sub>2</sub> vs<br>GM-CSF/IL-6 + PGE <sub>2</sub> + 1<br>μM TP16   | One-way ANOVA |
|    | <0.0001 | (% PMN-MDSC of BMMC)<br>GM-CSF/IL-6 + PGE <sub>2</sub> vs<br>GM-CSF/IL-6 + PGE <sub>2</sub> + 10<br>μM TP16  | One-way ANOVA |
| 5D | <0.0001 | GM-CSF/IL-6 vs<br>GM-CSF/IL-6 + PGE <sub>2</sub><br>( <i>Arg-1</i> )                                         | One-way ANOVA |
|    | 0.0001  | GM-CSF/IL-6 + PGE <sub>2</sub> vs<br>GM-CSF/IL-6 + PGE <sub>2</sub> +<br>TP16 ( <i>Arg-1</i> )               | One-way ANOVA |
|    | <0.0001 | GM-CSF/IL-6 vs<br>GM-CSF/IL-6 + PGE <sub>2</sub><br>( <i>Ptgs2</i> )                                         | One-way ANOVA |
|    | 0.0006  | GM-CSF/IL-6 + PGE <sub>2</sub> vs<br>GM-CSF/IL-6 + PGE <sub>2</sub> +<br>TP16 ( <i>Ptgs2</i> )               | One-way ANOVA |
|    | 0.040   | GM-CSF/IL-6 vs<br>GM-CSF/IL-6 + PGE <sub>2</sub> ( <i>Il-10</i> )                                            | One-way ANOVA |
|    | 0.010   | GM-CSF/IL-6 + PGE <sub>2</sub> vs<br>GM-CSF/IL-6 + PGE <sub>2</sub> +<br>TP16 ( <i>Il-10</i> )               | One-way ANOVA |
|    | 0.030   | GM-CSF/IL-6 vs<br>GM-CSF/IL-6 + PGE <sub>2</sub> ( <i>Il-4ra</i> )                                           | One-way ANOVA |
|    | 0.22    | GM-CSF/IL-6 + PGE <sub>2</sub> vs<br>GM-CSF/IL-6 + PGE <sub>2</sub> +<br>TP16 ( <i>Il-4ra</i> )              | One-way ANOVA |
| 5F | <0.0001 | Naïve CD8 <sup>+</sup> vs Activated<br>CD8 <sup>+</sup>                                                      | One-way ANOVA |
|    | <0.0001 | Activated CD8 <sup>+</sup> vs Activated                                                                      | One-way ANOVA |

|                   |                |                                                                                                                                    |                         |
|-------------------|----------------|------------------------------------------------------------------------------------------------------------------------------------|-------------------------|
|                   |                | CD8 <sup>+</sup> & Control Tumor CD11b <sup>+</sup> (2:1)                                                                          |                         |
|                   | <0.0001        | Activated CD8 <sup>+</sup> vs Activated CD8 <sup>+</sup> & Control Tumor CD11b <sup>+</sup> (1:1)                                  | One-way ANOVA           |
|                   | <0.0001        | Activated CD8 <sup>+</sup> vs Activated CD8 <sup>+</sup> & Control Tumor CD11b <sup>+</sup> (1:2)                                  | One-way ANOVA           |
|                   | <0.0001        | Activated CD8 <sup>+</sup> & Control Tumor CD11b <sup>+</sup> vs Activated CD8 <sup>+</sup> & TP-16 Tumor CD11b <sup>+</sup> (2:1) | One-way ANOVA           |
|                   | <0.0001        | Activated CD8 <sup>+</sup> & Control Tumor CD11b <sup>+</sup> vs Activated CD8 <sup>+</sup> & TP-16 Tumor CD11b <sup>+</sup> (1:1) | One-way ANOVA           |
|                   | <0.0001        | Activated CD8 <sup>+</sup> & Control Tumor CD11b <sup>+</sup> vs Activated CD8 <sup>+</sup> & TP-16 Tumor CD11b <sup>+</sup> (1:2) | One-way ANOVA           |
| <b>Figure 6</b>   | <b>P value</b> | <b>Comparison</b>                                                                                                                  | <b>Statistical test</b> |
| 6A                | 0.0058         | Control vs TP-16                                                                                                                   | One-way ANOVA           |
|                   | <0.0001        | Control vs anti-PD-1                                                                                                               | One-way ANOVA           |
|                   | <0.0001        | Control vs combination                                                                                                             | One-way ANOVA           |
| 6B                | 0.0066         | Control vs TP-16                                                                                                                   | Log-rank test           |
|                   | 0.0008         | Control vs anti-PD-1                                                                                                               | Log-rank test           |
|                   | <0.0001        | Control vs combination                                                                                                             | Log-rank test           |
|                   | 0.015          | TP-16 vs combination                                                                                                               | Log-rank test           |
| <b>Figure 7</b>   | <b>P value</b> | <b>Comparison</b>                                                                                                                  | <b>Statistical test</b> |
| 7C                | 0.012          | Control vs TP-16                                                                                                                   | One-way ANOVA           |
|                   | 0.0091         | Control vs anti-PD-1                                                                                                               | One-way ANOVA           |
|                   | 0.0005         | Control vs combination                                                                                                             | One-way ANOVA           |
|                   | 0.039          | Control vs anti-PD-1 (0-2 mm)                                                                                                      | Unpaired t test         |
|                   | 0.0019         | Control vs combination (2-4 mm)                                                                                                    | Unpaired t test         |
|                   | 0.012          | Control vs TP-16                                                                                                                   | Unpaired t test         |
|                   | 0.0006         | anti-PD-1 vs TP-16                                                                                                                 | Unpaired t test         |
|                   | 0.0038         | Control vs combination (2-4 mm)                                                                                                    | Unpaired t test         |
| <b>Figure EV2</b> | <b>P value</b> | <b>Comparison</b>                                                                                                                  | <b>Statistical test</b> |
| EV2A              | 0.0024         | Control vs celecoxib                                                                                                               | One-way ANOVA           |

|                   |                |                                                                                                   |                         |
|-------------------|----------------|---------------------------------------------------------------------------------------------------|-------------------------|
|                   | 0.0004         | Control vs TP-16                                                                                  | One-way ANOVA           |
| EV2B              | <0.0001        | Control vs TP-16                                                                                  | Unpaired t test         |
| EV2C              | 0.0061         | Control vs TP-16                                                                                  | Unpaired t test         |
| EV2D              | 0.040          | Control vs TP-16                                                                                  | Unpaired t test         |
| EV2E              | 0.0089         | Control vs TP-16                                                                                  | Unpaired t test         |
| EV2F              | 0.0007         | Control vs TP-16                                                                                  | Unpaired t test         |
|                   |                |                                                                                                   |                         |
|                   |                |                                                                                                   |                         |
| EV2H              | 0.018          | Control vs TP-16 (M1)                                                                             | Unpaired t test         |
|                   | 0.0042         | Control vs TP-16 (M2)                                                                             | Unpaired t test         |
|                   | 0.018          | Control vs TP-16 (mMDSC)                                                                          | Unpaired t test         |
|                   | 0.0067         | Control vs TP-16 (PMN-MDSC)                                                                       | Unpaired t test         |
| EV2I              | <0.0001        | Control vs TP-16                                                                                  | Unpaired t test         |
| EV2J              | 0.0004         | Control vs TP-16                                                                                  | Unpaired t test         |
| <b>Figure EV3</b> | <b>P value</b> | <b>Comparison</b>                                                                                 | <b>Statistical test</b> |
| EV3A              | <0.0001        | M-CSF + IL-4 vs M-CSF + IL-4 + PGE <sub>2</sub>                                                   | One-way ANOVA           |
|                   | <0.0001        | M-CSF + IL-4 + PGE <sub>2</sub> vs M-CSF + IL-4 + PGE <sub>2</sub> + 10 μM TP-16 (Si)             | One-way ANOVA           |
|                   | <0.0001        | M-CSF + IL-4 + PGE <sub>2</sub> vs M-CSF + IL-4 + PGE <sub>2</sub> + 1 μM TP-16 (Si)              | One-way ANOVA           |
|                   | <0.0001        | M-CSF + IL-4 + PGE <sub>2</sub> vs M-CSF + IL-4 + PGE <sub>2</sub> + 0.1 μM TP-16 (Si)            | One-way ANOVA           |
|                   | <0.0001        | M-CSF + IL-4 + PGE <sub>2</sub> vs M-CSF + IL-4 + PGE <sub>2</sub> + 10 μM TP-16 (Se)             | One-way ANOVA           |
|                   | <0.0001        | M-CSF + IL-4 + PGE <sub>2</sub> vs M-CSF + IL-4 + PGE <sub>2</sub> + 1 μM TP-16 (Se)              | One-way ANOVA           |
|                   | <0.0001        | M-CSF + IL-4 + PGE <sub>2</sub> vs M-CSF + IL-4 + PGE <sub>2</sub> + 0.1 μM TP-16 (Se)            | One-way ANOVA           |
| EV3E              | <0.0001        | Naïve CD4 <sup>+</sup> vs Activated CD4 <sup>+</sup>                                              | One-way ANOVA           |
|                   | <0.0001        | Activated CD4 <sup>+</sup> vs Activated CD4 <sup>+</sup> & Control Tumor CD11b <sup>+</sup> (2:1) | One-way ANOVA           |
|                   | <0.0001        | Activated CD4 <sup>+</sup> vs Activated CD4 <sup>+</sup> & Control Tumor                          | One-way ANOVA           |

|                   |                |                                                                                                                                    |                         |
|-------------------|----------------|------------------------------------------------------------------------------------------------------------------------------------|-------------------------|
|                   |                | CD11b <sup>+</sup> (1:1)                                                                                                           |                         |
|                   | <0.0001        | Activated CD4 <sup>+</sup> vs Activated CD4 <sup>+</sup> & Control Tumor CD11b <sup>+</sup> (1:2)                                  | One-way ANOVA           |
|                   | 0.076          | Activated CD4 <sup>+</sup> & Control Tumor CD11b <sup>+</sup> vs Activated CD4 <sup>+</sup> & TP-16 Tumor CD11b <sup>+</sup> (2:1) | One-way ANOVA           |
|                   | <0.0001        | Activated CD4 <sup>+</sup> & Control Tumor CD11b <sup>+</sup> vs Activated CD4 <sup>+</sup> & TP-16 Tumor CD11b <sup>+</sup> (1:1) | One-way ANOVA           |
|                   | <0.0001        | Activated CD4 <sup>+</sup> & Control Tumor CD11b <sup>+</sup> vs Activated CD4 <sup>+</sup> & TP-16 Tumor CD11b <sup>+</sup> (1:2) | One-way ANOVA           |
| <b>Figure EV4</b> | <b>P value</b> | <b>Comparison</b>                                                                                                                  | <b>Statistical test</b> |
| EV4B              | 0.016          | Control vs TP-16                                                                                                                   | One-way ANOVA           |
|                   | 0.0056         | Control vs anti-PD-1                                                                                                               | One-way ANOVA           |
|                   | <0.0001        | Control vs combination                                                                                                             | One-way ANOVA           |
| EV4E              | 0.010          | Control vs TP-16 (IL-6)                                                                                                            | One-way ANOVA           |
|                   | 0.0001         | Control vs anti-PD-1 (IL-6)                                                                                                        | One-way ANOVA           |
|                   | <0.0001        | Control vs combination (IL-6)                                                                                                      | One-way ANOVA           |
|                   | 0.0005         | Control vs TP-16 (CXCL-1)                                                                                                          | One-way ANOVA           |
|                   | 0.0001         | Control vs anti-PD-1 (CXCL-1)                                                                                                      | One-way ANOVA           |
|                   | <0.0001        | Control vs combination (CXCL1)                                                                                                     | One-way ANOVA           |



Appendix Table S9. KEY RESOURCES TABLE

| REAGENT or RESOURCE                     | SOURCE        | IDENTIFIER |
|-----------------------------------------|---------------|------------|
| Antibodies                              |               |            |
| PerCP/Cy5.5 anti-mouse CD45 antibody    | BioLegend     | 103132     |
| APC anti-mouse CD8a antibody            | BioLegend     | 100712     |
| PE anti-mouse IFN- $\gamma$ antibody    | BD Pharmingen | 562020     |
| PE anti-mouse Granzyme B antibody       | eBioscience   | 12-8898-80 |
| PE anti-mouse TNF- $\alpha$ antibody    | BioLegend     | 506305     |
| APC anti-mouse F4/80 antibody           | BioLegend     | 123116     |
| PE anti-mouse CD11c antibody            | BioLegend     | 177307     |
| APC anti-mouse CD11c antibody           | BioLegend     | 117310     |
| PE anti-mouse Ly6C antibody             | BioLegend     | 128008     |
| PerCP/Cy5.5 anti-mouse Ly6G antibody    | BioLegend     | 127616     |
| APC anti-mouse LY6G antibody            | BioLegend     | 108412     |
| FITC anti-mouse/human CD11b antibody    | BioLegend     | 101206     |
| APC anti-mouse CD4 antibody             | BioLegend     | 100411     |
| PerCP/Cy5.5 anti-mouse CD4 antibody     | BioLegend     | 100433     |
| PE anti-mouse MHC-II antibody           | BioLegend     | 107608     |
| PE anti-mouse CD206 antibody            | BioLegend     | 141706     |
| PE anti-mouse PD-1 antibody             | BioLegend     | 135205     |
| TruStain fcX                            | BioLegend     | 101320     |
| LEAF™ Purified anti-mouse CD3 antibody  | BioLegend     | 100207     |
| LEAF™ Purified anti-mouse CD28 antibody | BioLegend     | 102111     |
| In Vivo mAb anti-mouse                  | BioxCel       | BE0273     |

|                                                  |                 |          |
|--------------------------------------------------|-----------------|----------|
| PD-1                                             |                 |          |
| Anti-Granzyme B antibody                         | Abcam           | ab4059   |
| Anti-CD8 antibody                                | Abcam           | ab217344 |
| Anti-Gr1 antibody                                | R&D             | Mab1037  |
| Anti-CD11b antibody                              | Abcam           | Ab133357 |
| Anti-PD-1 antibody                               | Servicebio      | GB13338  |
| Anti-PD-L1 antibody                              | Servicebio      | GB13339  |
| P-STAT3 <sup>Tyr705</sup> antibody               | CST             | 9145     |
| STAT3 antibody                                   | CST             | 9139     |
| P-AKT <sup>Ser473</sup> antibody                 | CST             | 4060     |
| AKT antibody                                     | CST             | 9272     |
| Arg1 antibody                                    | Proteintech     | 16001    |
| COX2 antibody                                    | CST             | 12282    |
| GAPDH antibody                                   | Abcam           | Ab181602 |
| P-ERK <sup>Thr218/Tyr220</sup> antibody          | CST             | 4370     |
| ERK antibody                                     | CST             | 9102     |
| CD206 antibody                                   | Abcam           | ab64693  |
| F4/80 antibody                                   | Abcam           | ab6640   |
| P-CREB <sup>S133</sup> antibody                  | Abcam           | ab32096  |
| TNF $\alpha$ antibody                            | Abcolonal       | A11534   |
| Chemicals, Peptides, and Recombinant Proteins    |                 |          |
| Celecoxib                                        | Sigma           | PHR1683  |
| PGE <sub>2</sub>                                 | Cayman Chemical | 14010    |
| ONO-8711                                         | Cayman Chemical | 14070    |
| PF-04418948                                      | TopScience      | T3306    |
| L-798106                                         | Sigma           | L4545    |
| CFSE                                             | Thermo          | C34554   |
| Recombinant murine GM-CSF                        | PeptoTech       | 315-03   |
| Recombinant murine IL-4                          | PeptoTech       | 214-14   |
| Recombinant murine IL-6                          | PeptoTech       | 216-16   |
| Recombinant murine M-CSF                         | PeptoTech       | 315-02   |
| Recombinant murine IFN- $\gamma$                 | PeptoTech       | 315-05   |
| Leukocyte Activation Cocktail, with BD GolgiPlug | BD Pharmingen   | 550583   |
| Critical Commercial Assays                       |                 |          |
| Prostaglandin E2 Express EIA Kit                 | Cayman Chemical | 500141   |
| Mouse IL-6 ELISA KIT                             | Biolegend       | 431302   |
| Mouse CXCL1 ELISA KIT                            | Abnova          | KA0553   |

|                                            |                                          |                                                                                   |
|--------------------------------------------|------------------------------------------|-----------------------------------------------------------------------------------|
| FLIPR Calcium 5 Assay Kit                  | Molecular Devices                        | R8185                                                                             |
| GloSensor™ cAMP Assay kit                  | Promega                                  | E1291                                                                             |
| Luciferase Reporter Assay System           | Promega                                  | E1960                                                                             |
| MTS Cell Titer 96 Cell Proliferation Assay | Promega                                  | G3581                                                                             |
| MojoSort™ Mouse CD3 T Cell Isolation Kit   | BioLegend                                | 480024                                                                            |
| CD11b MicroBeads, human and mouse          | Miltenyi                                 | 130-049-601                                                                       |
| Fixation/Permeabilization Solution Kit     | BD Pharmingen                            | 554714                                                                            |
| Deposited DATA                             |                                          |                                                                                   |
| GSE23502                                   | Yang XD et al., 2011                     | <a href="https://www.ncbi.nlm.nih.gov/gds">https://www.ncbi.nlm.nih.gov/gds</a> . |
| GSE132004                                  | This paper                               |                                                                                   |
| Experimental Models: Cell lines            |                                          |                                                                                   |
| 4T1                                        | ATCC                                     | CRL-2539                                                                          |
| B16F10                                     | CRCPUMC                                  | TCM36                                                                             |
| Pan02                                      | CRCPUMC                                  | N/A                                                                               |
| MC38                                       | CRCPUMC                                  | N/A                                                                               |
| CT26                                       | ATCC                                     | CRL-2638                                                                          |
| HCT116                                     | ATCC                                     | CCL-247                                                                           |
| HCT8                                       | ATCC                                     | CCL-244                                                                           |
| HT29                                       | ATCC                                     | HTB-38                                                                            |
| DLD1                                       | ATCC                                     | CCL-221                                                                           |
| CHO                                        | CRCPUMC                                  | GNHa 3                                                                            |
| CHO-Gα16                                   | This paper                               | N/A                                                                               |
| HEK293                                     | CRCPUMC                                  | GNHu43                                                                            |
| HEK293T                                    | CRCPUMC                                  | GNHu17                                                                            |
| HUVECs                                     | This paper                               | N/A                                                                               |
| Experimental Models: Organisms/Strains     |                                          |                                                                                   |
| Mouse: BALB/c                              | National Rodent Laboratory Animal Center | N/A                                                                               |
| Mouse: BALB/c nude                         | National Rodent Laboratory Animal        | N/A                                                                               |

|                                           |                                          |                       |
|-------------------------------------------|------------------------------------------|-----------------------|
|                                           | Center                                   |                       |
| Mouse: C57BL                              | National Rodent Laboratory Animal Center | N/A                   |
| Oligonucleotides                          |                                          |                       |
| PCR primers                               | q-PCR                                    | See Appendix Table S1 |
| Recombinant DNA                           |                                          |                       |
| Plasmid: LentiCRISPV2                     | Addgene                                  | 52961                 |
| Plasmid: psPAX2                           | Addgene                                  | 12260                 |
| Plasmid: pVSVg                            | Addgene                                  | 8454                  |
| Plasmid: Human Ptger1                     | cDNA Resource Center                     | PER0100000            |
| Plasmid: Human Ptger2                     | cDNA Resource Center                     | PER020TN00            |
| Plasmid: Human Ptger3                     | cDNA Resource Center                     | PER3VI0000            |
| Plasmid: Human Ptger4                     | cDNA Resource Center                     | PER0400000            |
| Plasmid: pCMV-Entry-Ptger4 (Mouse)        | This paper                               | N/A                   |
| Plasmid: pcDNA3.1-3*Flag-Ptger4 (Rat)     | This paper                               | N/A                   |
| Plasmid: pcDNA3.1-3*Flag- Ptger4 (Dog)    | This paper                               | N/A                   |
| Plasmid: pcDNA3.1-3*Flag- Ptger4 (Monkey) | This paper                               | N/A                   |
| Plasmid: pGloSensor™-22F cAMP             | Promega                                  | E2301                 |
| Plasmid: CRE-luc                          | This paper                               | N/A                   |
| Plasmid: Tango-Ptger4                     | Addgene                                  | 66486                 |
| Plasmid: Kras (G12V)                      | Addgene                                  | 64602                 |
| Plasmid: Hras1 (G12V)                     | Addgene                                  | 64603                 |
| Plasmid: MEK1 (S218D,                     | Addgene                                  | 64604                 |

|                                                    |              |       |
|----------------------------------------------------|--------------|-------|
| S222D)                                             |              |       |
| Plasmid: PI3KCA                                    | Addgene      | 64605 |
| Plasmid: AKT1                                      | Addgene      | 64606 |
| Plasmid: IKK $\alpha$ (S176E, S180E)               | Addgene      | 64607 |
| Plasmid: JAK2 (V617F)                              | Addgene      | 64609 |
| Plasmid: STAT3 (A662C, N664C, V617F)               | Addgene      | 64610 |
| Plasmid: $\beta$ -catenin (S33A, S37A, T41A, S45A) | Addgene      | 64611 |
| Plasmid: Mkk7-JNK2 fusion                          | Addgene      | 64618 |
| Plasmid: TGF $\beta$ R1 (T204D)                    | Addgene      | 64629 |
| Software and Algorithms                            |              |       |
| Flow Jo VX                                         | Flow Jo, LLC | N/A   |
| GraphPad Prism 7                                   | GraphPad     | N/A   |
