# Supplementary material for: Reprogramming immunosuppressive myeloid cells facilitates immunotherapy for colorectal cancer
Source: PubMed Central journal article supplement (PMC7799360; doi:10.15252/emmm.202012798), 2020-12-07
Supplement: EMMM-13-e12798-s002.pdf [file EMMM-13-e12798-s002.pdf]

## Expanded View Figures

**Figure EV1. Antagonistic activity, pharmacokinetic profiles, and safety of TP-16.**

- A Dose–response of TP-16 in cAMP reporter gene assay in HEK293 cells. Data are presented as mean  $\pm$  SEM derived from three independent experiments ( $n = 3$ ).
- B Dose–effect curves of TP-16 in PGE<sub>2</sub>-induced  $\beta$ -arrestin Tango assay. Data are presented as mean  $\pm$  SEM derived from three independent experiments ( $n = 3$ ).
- C–E The antagonistic activities of TP-16 on EP4 were determined by a calcium flux assay by overexpressing G $\alpha$ 16 protein in CHO cells. Dose–response curves of TP-16 against EP4: monkey (C), rat (D), and mouse (E). Data are presented as mean  $\pm$  SEM derived from three independent experiments ( $n = 3$ ).
- F, G The plasma concentration over time profiles of TP-16 after intravenous and oral administration of TP-16 at a dose of 1 and 10 mg/kg, respectively. Results are presented as mean  $\pm$  SEM of three CD1 mice ( $n = 3$ ).
- H Body weights of male and female SD rats orally administered with TP-16 (100 mg/kg/day) in 14-day repeat-dose. Data are presented as means  $\pm$  SD ( $n = 3$ /sex/group).

Data information: Data are presented as mean  $\pm$  SEM except for H.

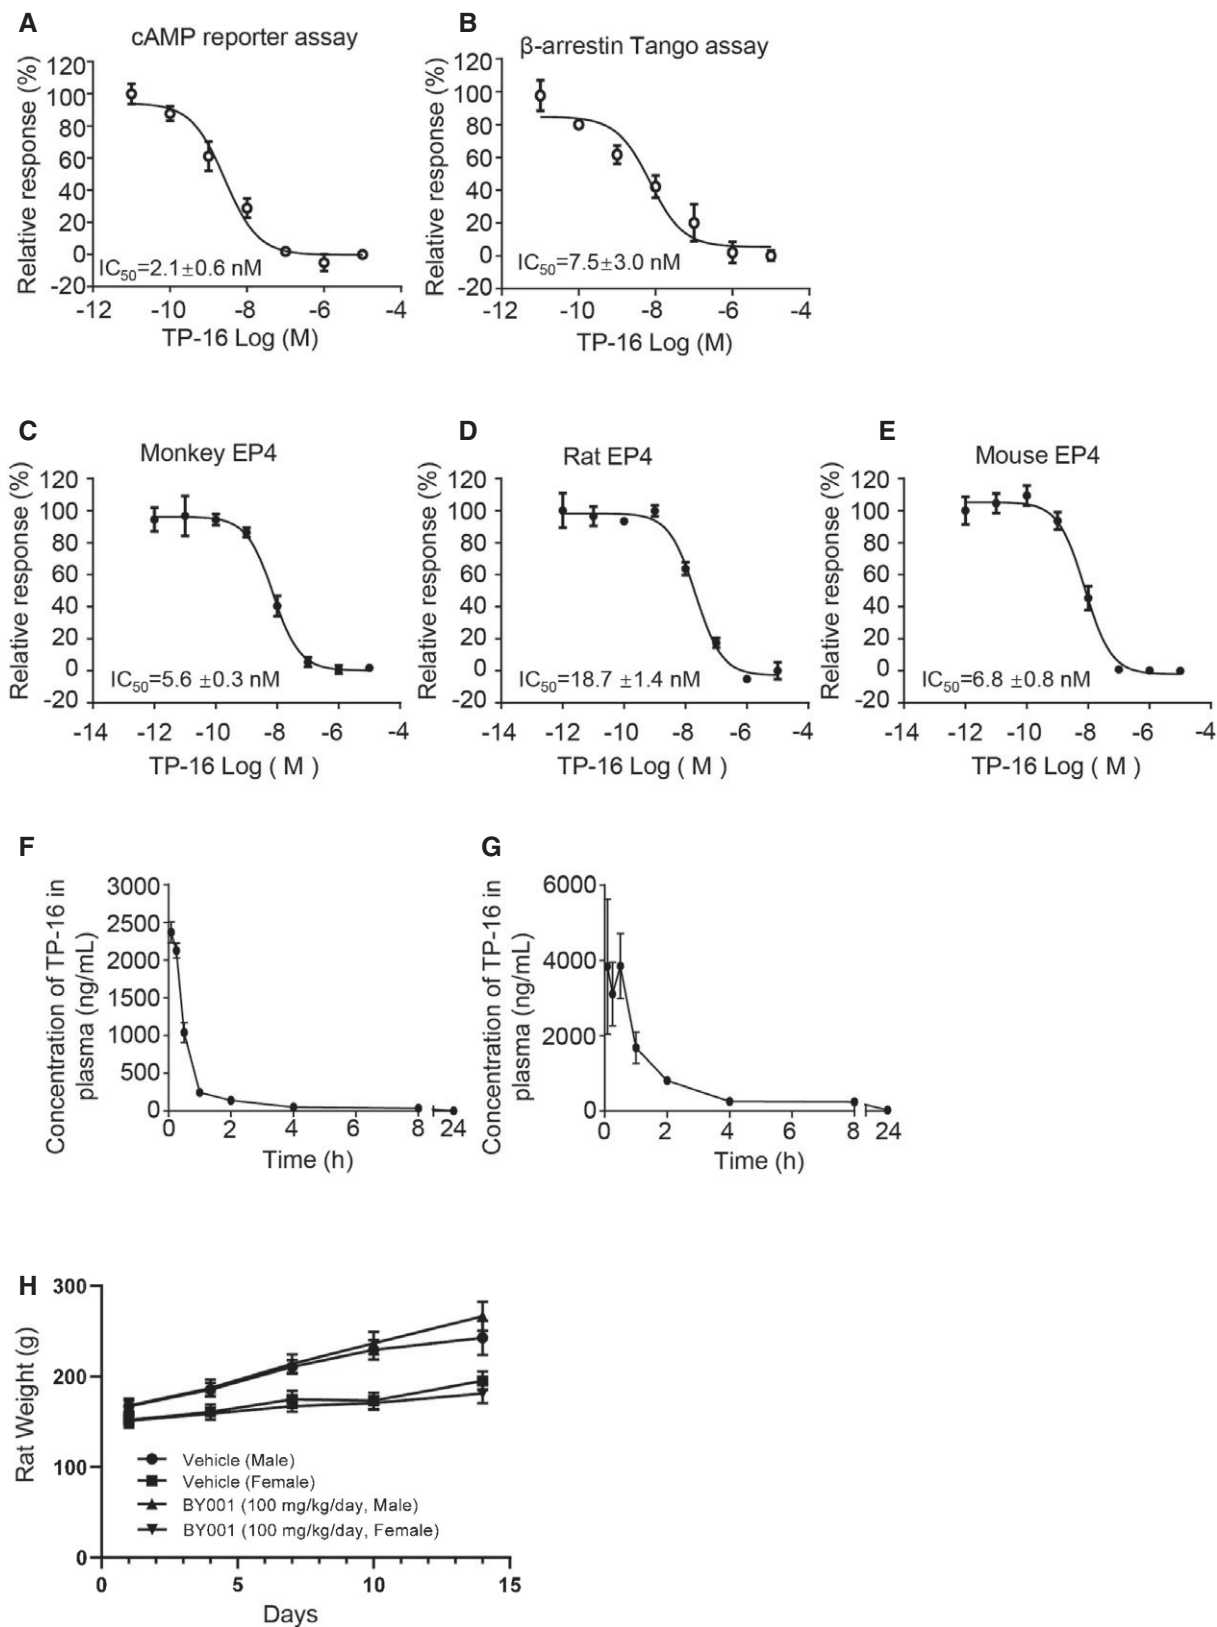

Figure EV1.

**Figure EV2. Effect of EP4 inhibition by TP-16 on tumor growth and subsets of intratumoral immune cells.**

- A The growth curves of CT26 xenograft tumors in BALB/c mice. CT26 tumor-bearing mice were treated with TP-16 (75 mg/kg, p.o., daily) or celecoxib (100 mg/kg, p.o., daily) for 16 days when tumor volumes reached 100–200 mm<sup>3</sup> (day 7). Data are presented as mean ± SEM. One-way analysis of variance (ANOVA), Tukey's multiple comparison; \*\*\**P* < 0.001. *n* = 6.
- B, C The anti-tumor activity of TP-16 on 4T1 xenograft tumors in BALB/c mice and Pan02 xenograft tumors in C57BL/6 mice. Mice were treated with TP-16 (75 mg/kg, po, daily) when tumor volumes reached 100–200 mm<sup>3</sup> (day 7). Data are presented as mean ± SEM. A two-tailed unpaired Student's *t*-test was performed; \*\**P* < 0.01; \*\*\**P* < 0.001 (*n* = 8).
- D, E Single-cell suspensions of tumors from CT26-bearing BALB/c mice treated with vehicle or 75 mg/kg TP-16 for 2 weeks were analyzed for intratumoral immune cells by flow cytometry analysis. Representative graphs and quantification of CD11b<sup>+</sup>F4/80<sup>+</sup> macrophages (D) and CD45<sup>+</sup>CD11b<sup>+</sup>CD11c<sup>+</sup>MHC II<sup>+</sup> dendritic cells (DCs) (E). Data are presented as mean ± SEM. A two-tailed unpaired Student's *t*-test was performed; \**P* < 0.05; \*\**P* < 0.01 (*n* = 5).
- F Representative graphs and quantification of TNF-α in CD11b<sup>+</sup> cells isolated from the CT26 xenograft tumors (*n* = 6). Data are presented as mean ± SEM. A two-tailed unpaired Student's *t*-test was performed, \*\*\**P* < 0.001 versus the vehicle control group.
- G Representative immunofluorescence images of p-CREB in CD11b<sup>+</sup> cells of CT26 tumor tissue. Scale bars, 50 μm.
- H The changes of myeloid cell compartment in an orthotopic colorectal cancer mouse model, CT26-Luc model (*n* = 4). A two-tailed unpaired Student's *t*-test was performed, \**P* < 0.05, \*\**P* < 0.01 versus vehicle control group.
- I, J Representative graphs and quantification of CD4<sup>+</sup> T-cell activation markers IFN-γ (I) and TNF-α (J) (*n* = 5). Data are presented as mean ± SEM derived from three independent experiments. A two-tailed unpaired Student's *t*-test was performed, \*\*\**P* < 0.001 versus the vehicle control group.

Source data are available online for this figure.

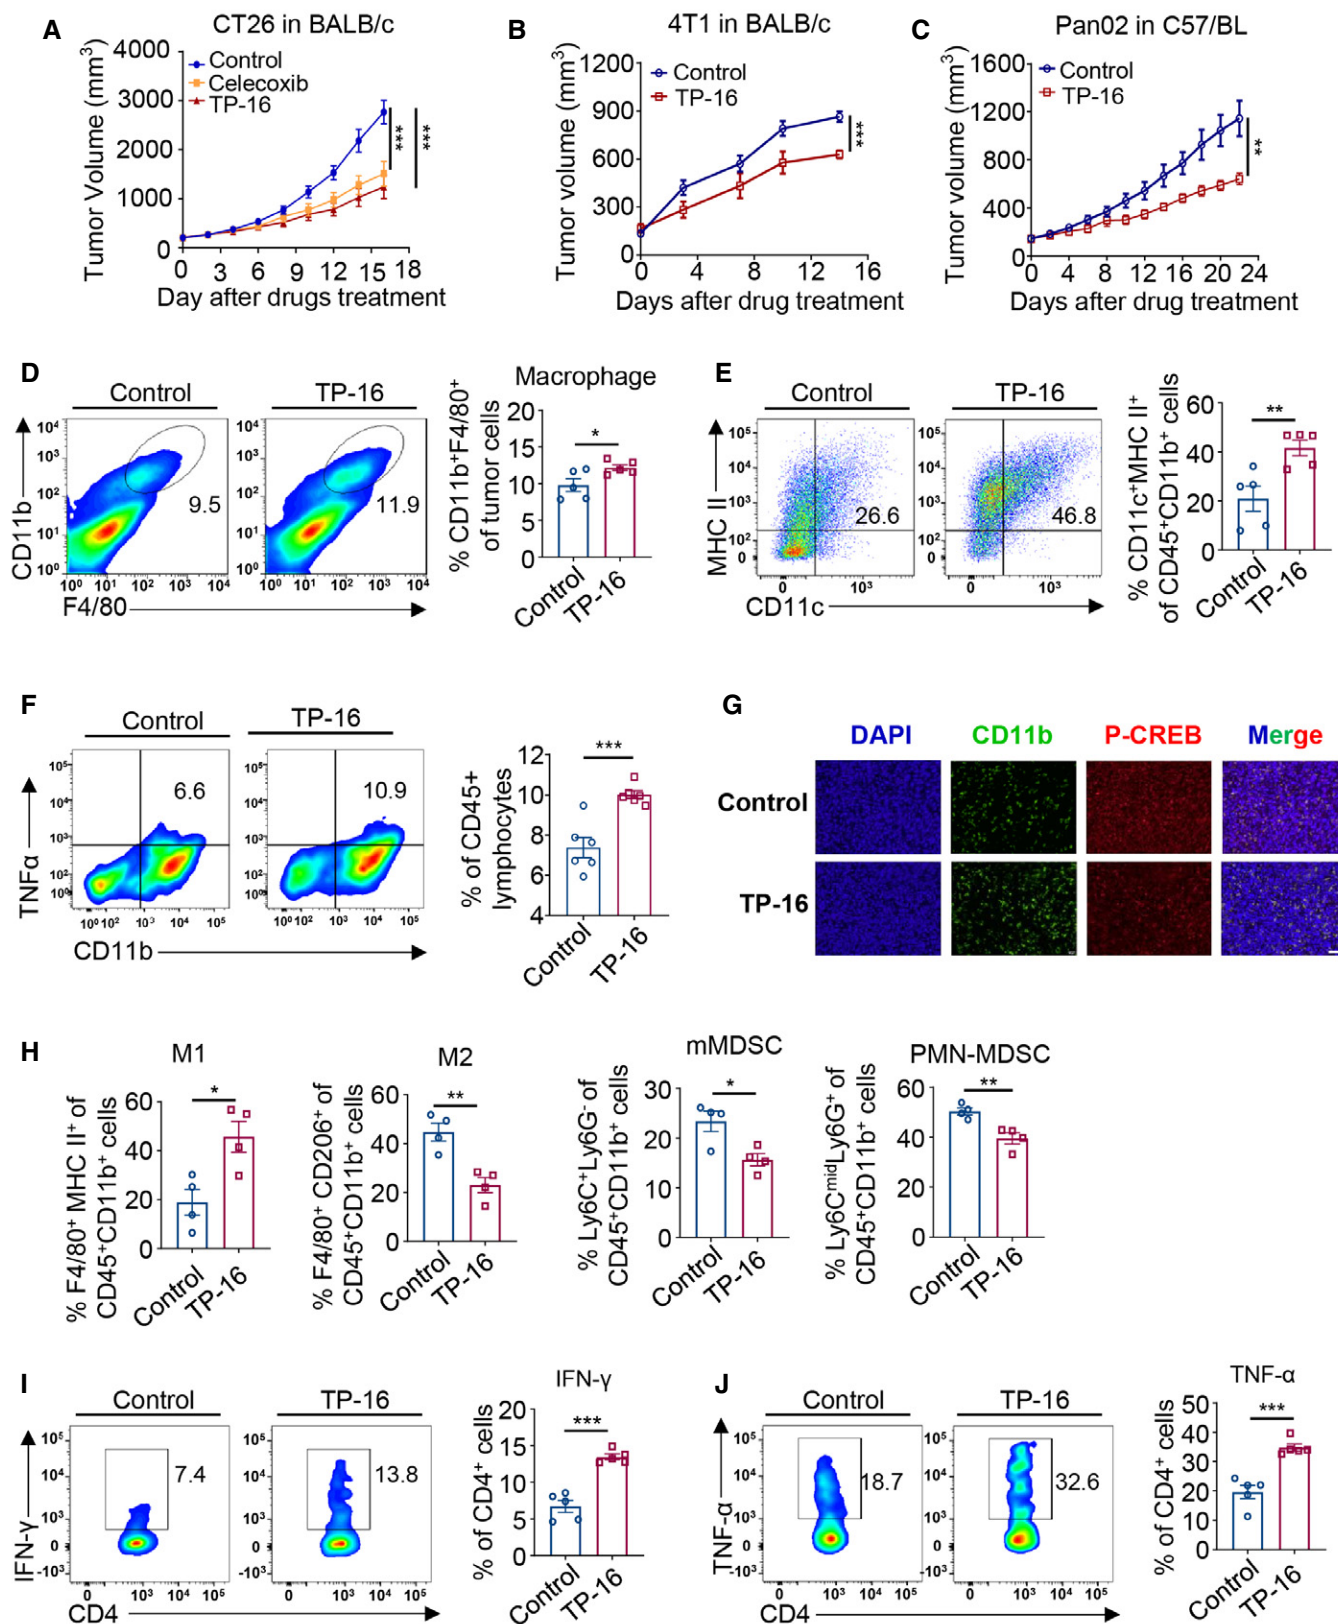

Figure EV2.

**Figure EV3. TP-16 suppresses M2 macrophage differentiation and reverses T-cell proliferation when cultured with tumor-infiltrating CD11b<sup>+</sup> myeloid cells.**

- A Mouse bone marrow cells were cultured with M-CSF/IL-4/PGE<sub>2</sub> for 6 days and varied concentrations of TP-16 was simultaneously (day 0) or sequentially (day 3) added. The generation of M2 macrophages (F4/80<sup>+</sup>CD206<sup>+</sup>) was analyzed by flow cytometry analysis. Si: simultaneous TP-16 treatment; Se: sequential TP-16 treatment. Data are presented as mean ± SEM. One-way analysis of variance (ANOVA) and Tukey's multiple comparison test were performed; \*\*\**P* < 0.001 (*n* = 3).
- B, C Mouse bone marrow-derived macrophages (BMMs) were stimulated with 20 ng/ml mouse recombinant IL-4 alone or in combination with 100 nM PGE<sub>2</sub>, in the absence or presence of 10 μM TP-16 for the indicated time. The expression of p-STAT3<sup>705</sup>, p-STAT3<sup>727</sup>, p-STAT3, p-AKT<sup>473</sup>, p-AKT<sup>308</sup>, and AKT was detected by Western blotting. GAPDH served as the loading control.
- D, E Representative histograms (D) and percentage (E) of CD4<sup>+</sup> T-cell proliferation at a ratio of 2:1, 1:1, and 1:2 CD4<sup>+</sup> T cells to CD11b<sup>+</sup> myeloid cells collected from CT26 tumor-bearing mice at 2 weeks post-treatment with vehicle or 75 mg/kg TP-16. All data are presented as mean ± SEM derived from three independent experiments (*n* = 3). A two-tailed unpaired Student's *t*-test was performed, \*\*\**P* < 0.001.

Source data are available online for this figure.

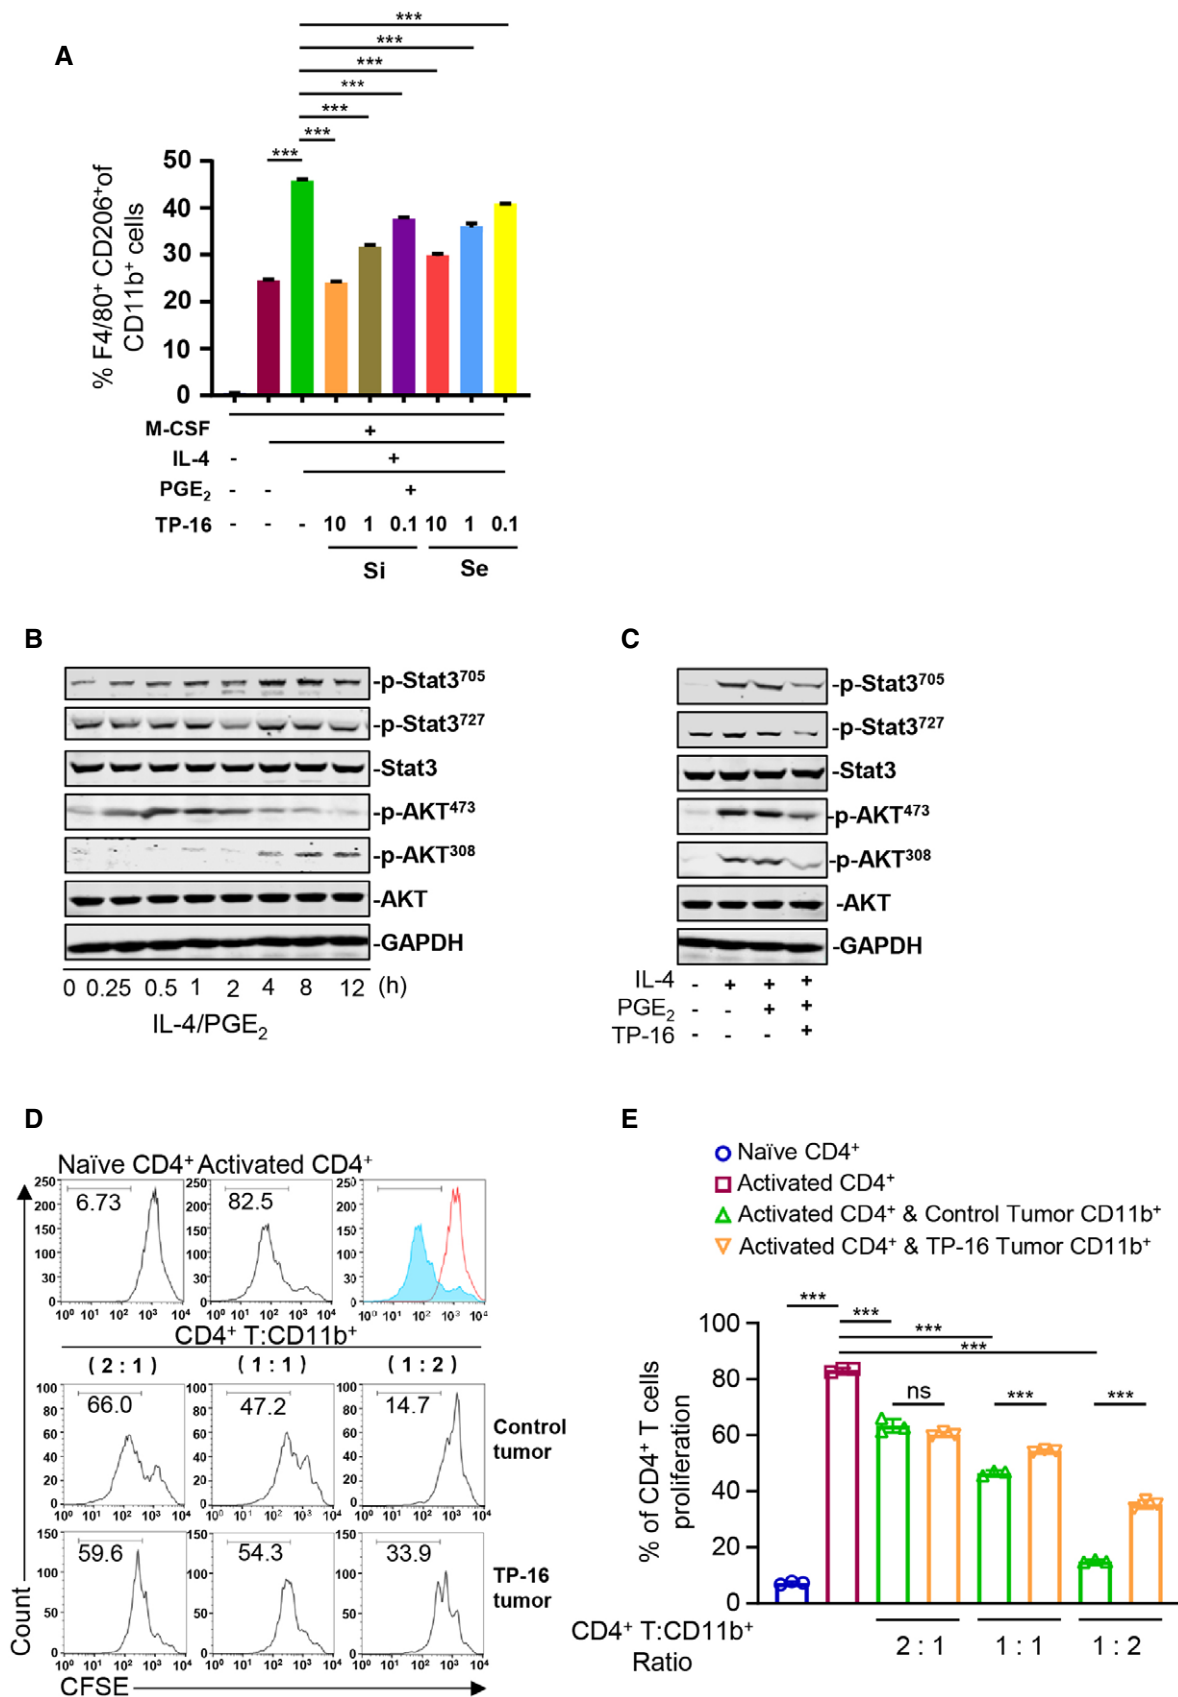

Figure EV3.

**Figure EV4. In vivo efficacy of EP4 antagonist (TP-16) combined with immune checkpoint blockade.**

- A Body weight of mice (CT26 syngeneic tumor model).
- B The growth of MC38 tumors treated with vehicle, TP-16 (75 mg/kg, po, daily), anti-PD-1 (50  $\mu$ g, ip, twice weekly), and TP-16 combined with anti-PD-1 antibody ( $n = 8$  per group). Data are presented as mean  $\pm$  SEM. One-way ANOVA and Tukey's multiple comparison test were performed; \* $P < 0.05$ ; \*\* $P < 0.01$ ; \*\*\* $P < 0.001$ .
- C Body weight of mice (MC38 syngeneic tumor model).
- D Representative immunofluorescence staining images of tumor sections from CT26 tumor-bearing mice stained for myeloid-derived suppressor cells (MDSCs; CD11b<sup>+</sup>Gr1<sup>+</sup>, upper panel) and M2 macrophages (CD11b<sup>+</sup>CD206<sup>+</sup>, lower panel). Scale bars, 50  $\mu$ m.
- E Cytokines (IL-6 and CXCL1) in the peripheral blood of CT26 tumor-bearing mice treated as indicated were measured by enzyme-linked immunosorbent assay (ELISA) on the last day of treatment ( $n = 6$ ). One-way analysis of variance (ANOVA) and Turkey *post hoc* test were performed, \* $P < 0.05$ , \*\* $P < 0.01$ ; \*\*\* $P < 0.001$ .
- F Pathway enrichment was analyzed based on the subsets of differentially expressed genes influenced by the combination therapy of TP-16 and anti-PD-1 antibody.

Source data are available online for this figure.

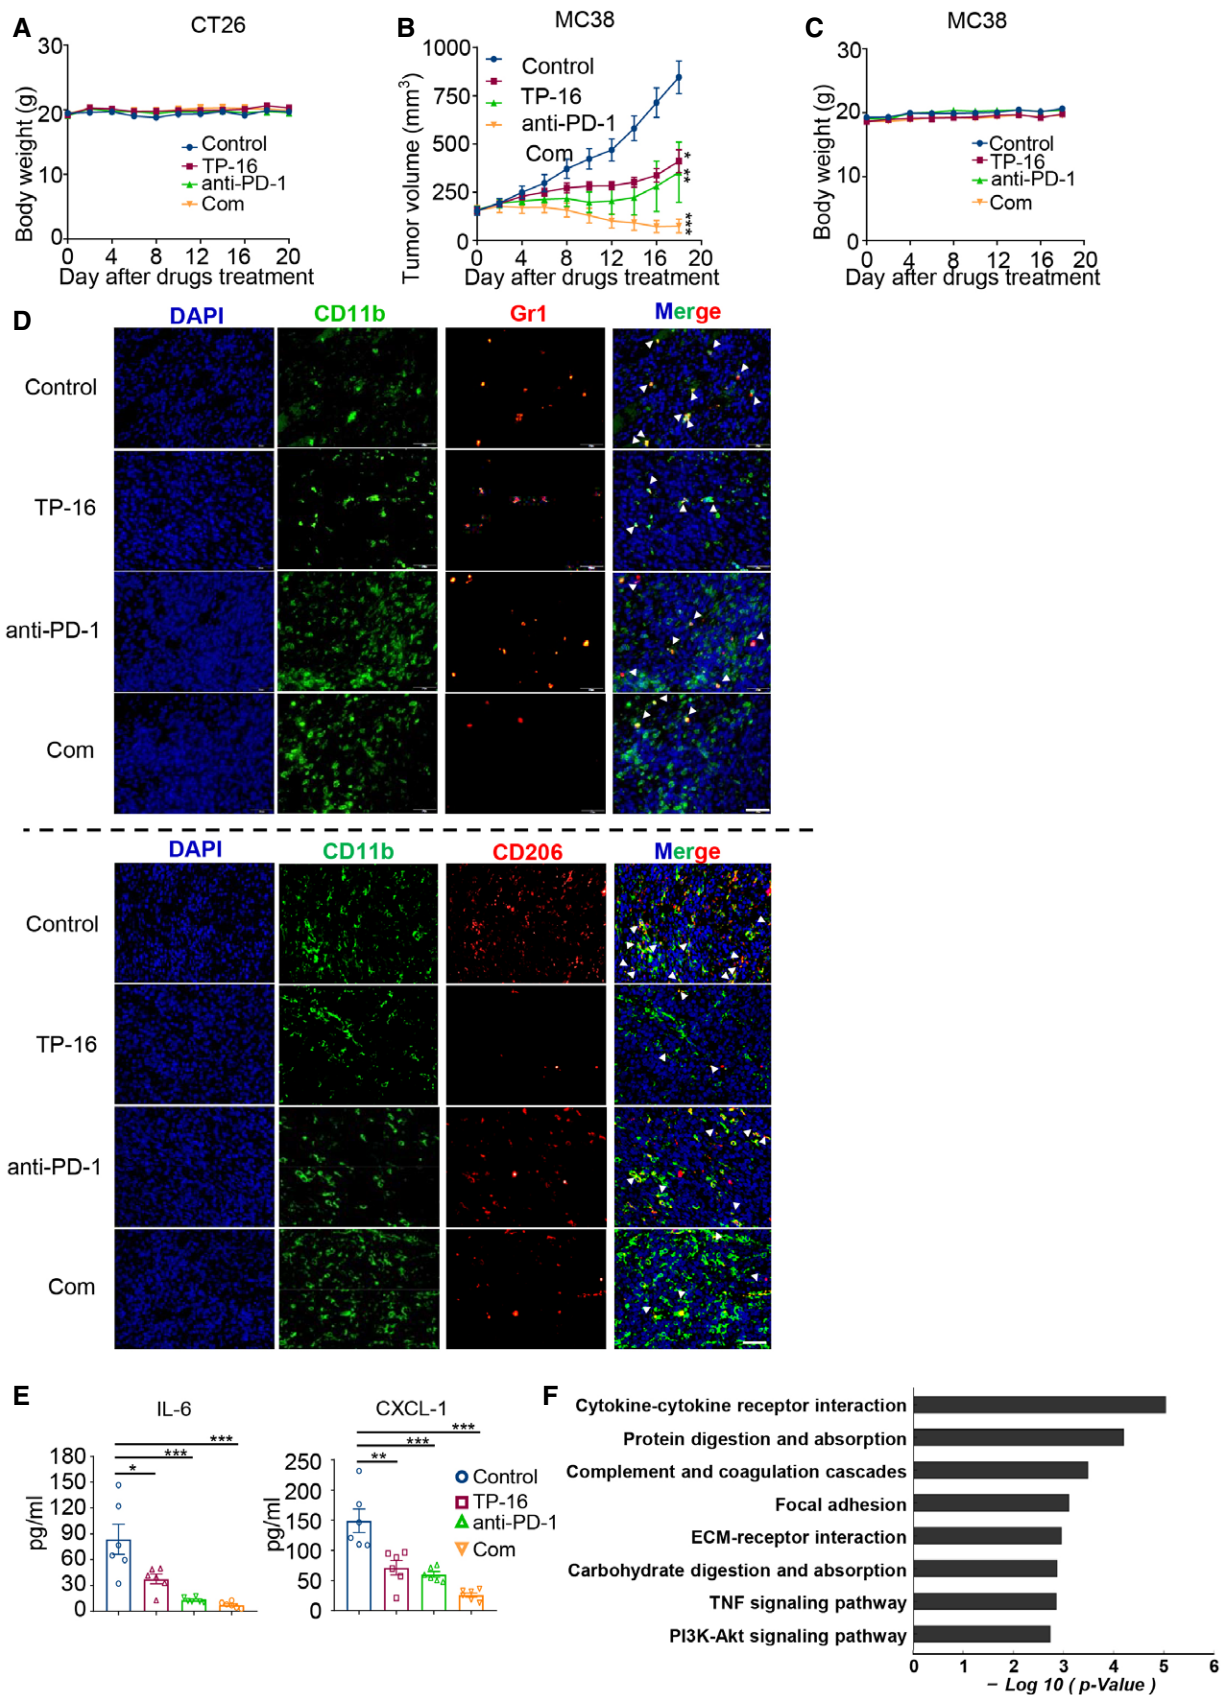

Figure EV4.
