# Supplementary material for: Reprogramming immunosuppressive myeloid cells facilitates immunotherapy for colorectal cancer
Source: PubMed Central journal article supplement (PMC7799360; doi:10.15252/emmm.202012798), 2020-12-07

Figure 6C

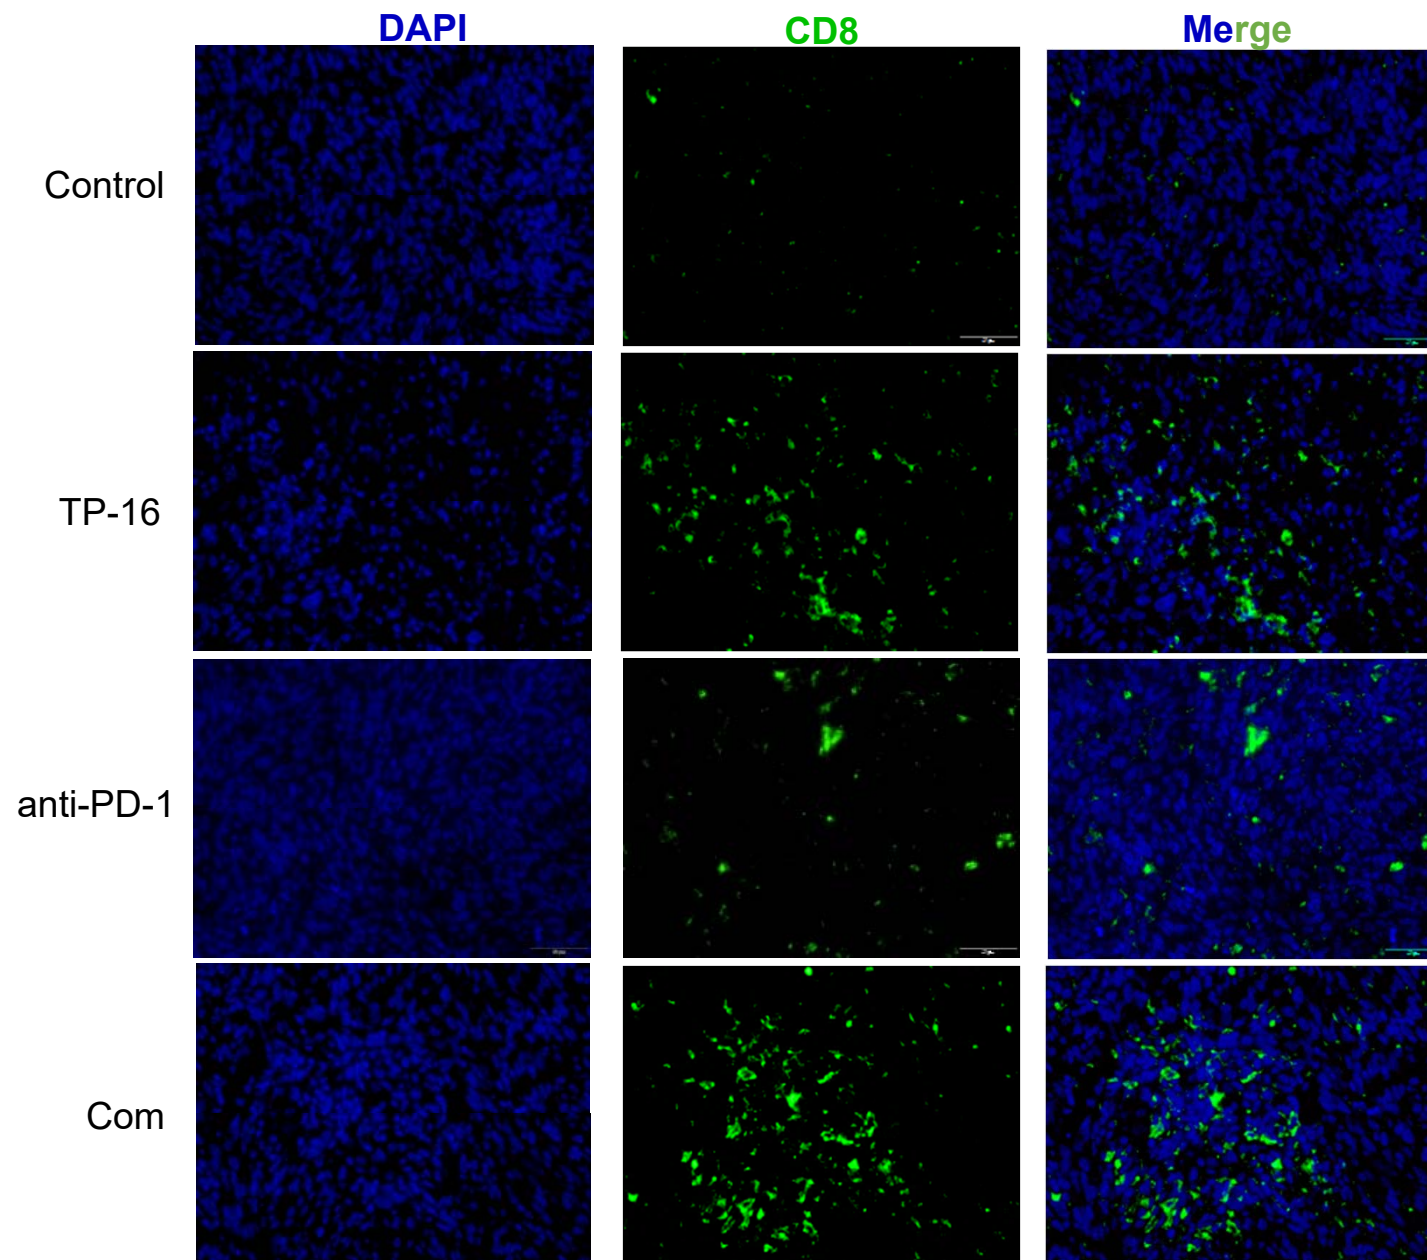

**Figure 6D**

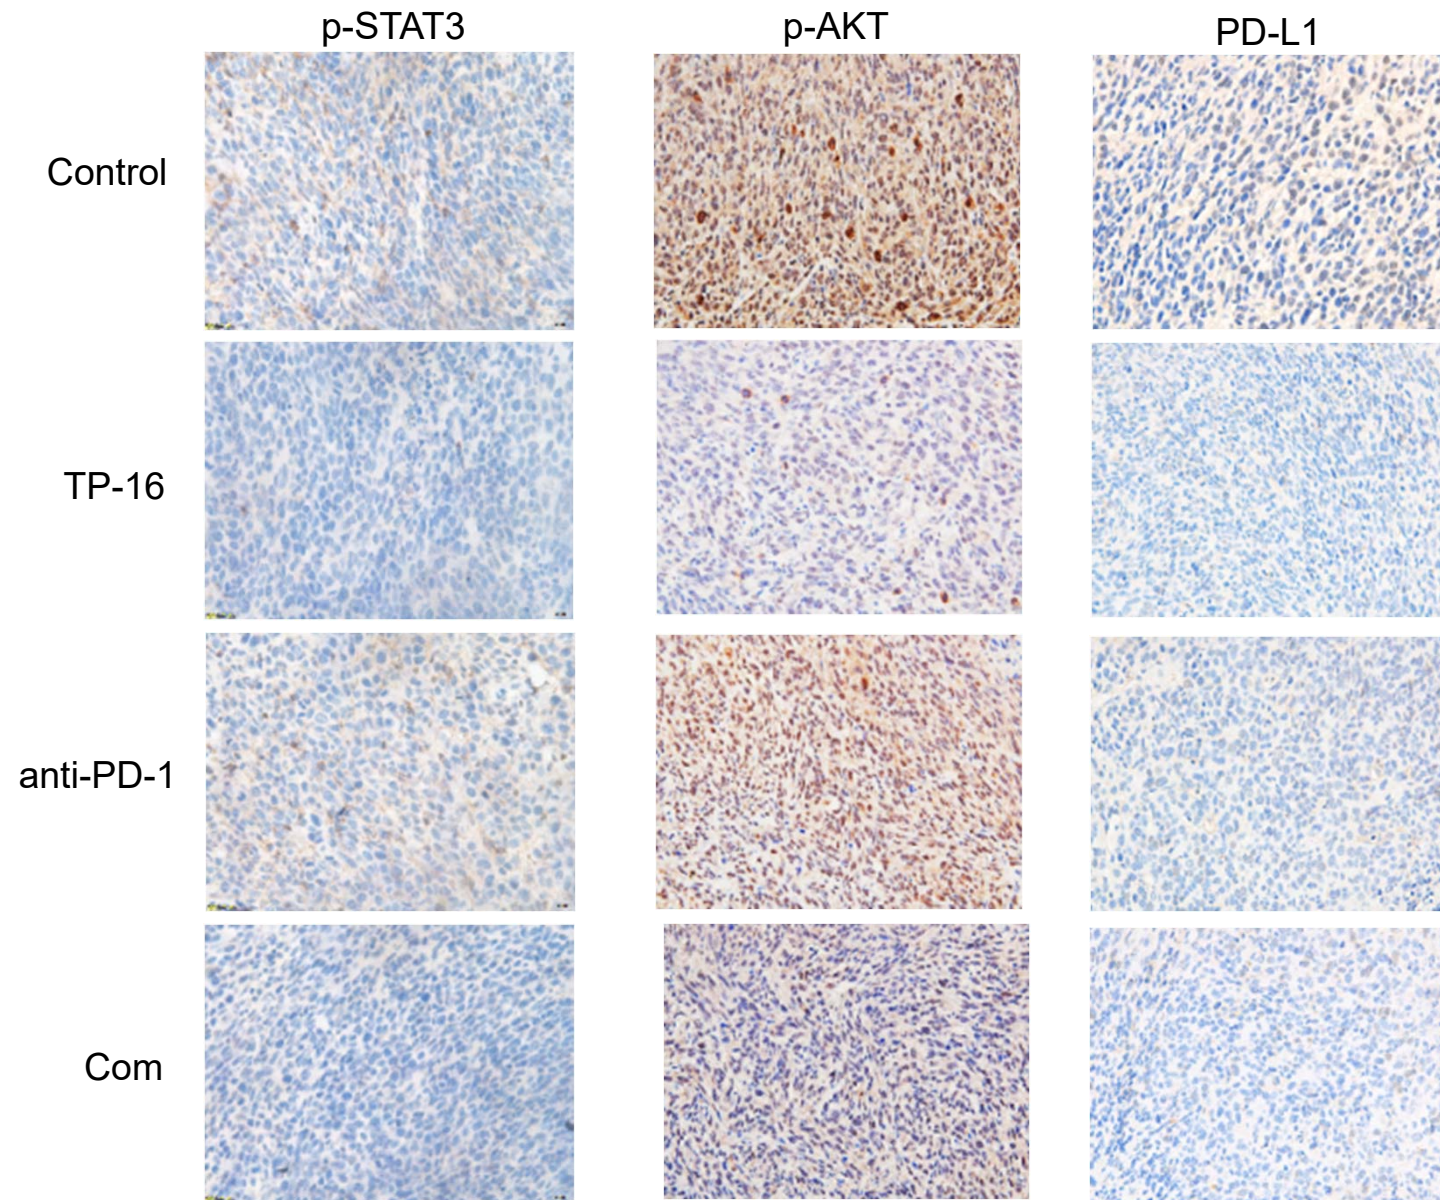

Supplement: EMMM-13-e12798-s004.pdf [file EMMM-13-e12798-s004.pdf]
